1                   **A genome-wide epistatic network underlies the molecular architecture**  
2                   **of continuous color variation of body extremities: a rabbit model**

3  
4  
5 Julie Demars<sup>1,\*</sup>, Yann Labrune<sup>1</sup>, Nathalie Iannuccelli<sup>1</sup>, Alice Deshayes<sup>2</sup>, Sophie Leroux<sup>1</sup>, H  l  ne  
6 Gilbert<sup>1</sup>, Patrick Aymard<sup>1</sup>, Florence Benitez<sup>1</sup>, Juliette Riquet<sup>1</sup>

7  
8  
9  
10 <sup>1</sup>GenPhySE, Universit   de Toulouse, INRAE, ENVT, Toulouse INP, F-31326 Castanet-Tolosan, France

11 <sup>2</sup>UMR967, CEA, INSERM, Institut de Radiobiologie Cellulaire et Mol  culaire, T  lom  res et r  paration  
12 du chromosome, F- 92265 Fontenay-aux-Roses, France

13  
14 \*corresponding author: [julie.demars@inrae.fr](mailto:julie.demars@inrae.fr)

15  
16 Julie Demars : [julie.demars@inrae.fr](mailto:julie.demars@inrae.fr)

17 Yann Labrune : [yann.labrune@inrae.fr](mailto:yann.labrune@inrae.fr)

18 Nathalie Iannuccelli : [nathalie.iannuccelli@inrae.fr](mailto:nathalie.iannuccelli@inrae.fr)

19 Alice Deshayes : [alice.deshayes@cea.fr](mailto:alice.deshayes@cea.fr)

20 Sophie Leroux : [sophie.leroux1@inrae.fr](mailto:sophie.leroux1@inrae.fr)

21 H  l  ne Gilbert : [helene.gilbert@inrae.fr](mailto:helene.gilbert@inrae.fr)

22 Patrick Aymard : [patrick.aymard@inrae.fr](mailto:patrick.aymard@inrae.fr)

23 Florence Benitez : [florence.benitez@inrae.fr](mailto:florence.benitez@inrae.fr)

24 Juliette Riquet : [juliette.riquet@inrae.fr](mailto:juliette.riquet@inrae.fr)

25  
26 **Running title** : Genomic basis of coat color of body extremities

27

28 **Abstract**

29 Deciphering the molecular architecture of coat coloration for a better understanding of the biological  
30 mechanisms underlying pigmentation still remains a challenge. We took advantage of a rabbit French  
31 experimental population in which both a pattern and a gradient of coloration from white to brown  
32 segregated within the himalayan phenotype. The whole experimental design was genotyped using the  
33 high density Affymetrix® AxiomOrcun™ SNP Array and phenotyped into 6 different groups ordered  
34 from the lighter to the darker. Genome-wide association analyses pinpointed an oligogenic determinism,  
35 under recessive and additive inheritance, involving genes already known in melanogenesis (*ASIP*, *KIT*,  
36 *MC1R*, *TYR*), and likely processed pseudogenes linked to ribosomal function, *RPS20* and *RPS14*. We  
37 also identified (i) gene-gene interactions through *ASIP:MC1R* affecting light cream/beige phenotypes  
38 while *KIT:RPS* responsible of dark chocolate/brown colors and (ii) a genome-wide epistatic network  
39 involving several others coloration genes such as *POT1* or *HPS5*. Finally, we determined the recessive  
40 inheritance of the English spotting phenotype likely involving a copy number variation affecting at least  
41 the end of the coding sequence of the *KIT* gene. Our analyses of coloration as a continuous trait allowed  
42 us to go beyond much of the established knowledge through the detection of additional genes and gene-  
43 gene interactions that may contribute to the molecular architecture of the coloration phenotype.  
44 Moreover, the characterization of a network including genes that contribute to melanogenesis and  
45 pigmentation, two processes affected in various human disorders, shows the potential interest of our  
46 rabbit model for transversal studies.

47

48 **Keywords:** coat coloration; epistasis; interaction; network; melanogenesis; pigmentation; recessivity;  
49 additivity; copy number variation

50

## 51 **Introduction**

52 Understanding the molecular mechanism of coloration has been the goal of many genetic and  
53 evolutionary studies in a broad number of species [1–3]. More than a hundred of genes have been  
54 involved in coloration traits in model species such as drosophila or mice but also in wild species [4–7].  
55 Specific color-producing cells contribute to animal coloration and patterns. The so-called “dermal  
56 chromatophore unit” [8] involves several types of chromatophores, including pterin and carotenoid-  
57 containing xantophors, iridophores with reflecting guanine platelets, and melanophores or melanocytes  
58 producing chemically melanin pigments. Phenotypic characteristics of animal coloration may be  
59 classified based on the patterning and/or type and amount of pigment produced through melanogenesis  
60 pathway [9]. The main genes that alter the development of melanocytes, corresponding to « spotting »  
61 phenotypes, are the Proto-Oncogene Receptor Tyrosine Kinase (*KIT*) and the Microphthalmia  
62 associated Transcription Factor (*MITF*) and the endothelin axis [10, 11]. Other genes such as Tyrosinase  
63 (*TYR*), Tyrosinase related Protein 1 (*TYRPI*), the Oculocutaneous albinism 2 (*OCA2*) and the  
64 Membrane-Associated Transporter Protein (*MATP*) affect melanin synthesis. Another group of genes  
65 related to pigment synthesis are those that control the switch between eumelanin and pheomelanin  
66 production ; those with the strongest effect in this change are the Melanocortin 1 Receptor (*MC1R*) and  
67 the Agouti Signaling Protein (*ASIP*).

68 Most of our current knowledge is restricted to color traits exhibiting relatively simple variation and  
69 inheritance patterns. As example, mice carrying the viable or lethal yellow mutation (2 dominant  
70 mutations in the *Asip* gene) exhibit a phenotype that includes yellow fur called Agouti [12, 13].  
71 Mutations in the *ASIP* gene have been highlighted in many other species displaying the Agouti coat  
72 color phenotype [14]. Similarly, red coat pigmentation in several mammals comes from mutations in  
73 the *MC1R* gene [14]. While many studies considered color traits as complex phenotypes analysing skin  
74 or hair colors as categories [15–17], most of recent analyses evaluated pigmentation as continuous  
75 variations [18–21]. Although GWAS have allowed for a greater understanding of the genetic component  
76 of many complex traits, the genetic effects highlighted are largely small and often focused on common  
77 SNP and additive genetic models. More and more studies explore alternative heritable components such  
78 as genetic interactions but there are still some challenges for identifying significant epistasis [22]. Skin,  
79 hair/coat pigmentation represent then pertinent phenotypes since the genetic determinism of coloration  
80 determined is likely polygenic involving a few genes with large effects [17, 23]. Typically, in the case  
81 of coat coloration, molecular interactions are known between *MC1R* and its antagonist *ASIP* peptide  
82 since gain-of-function *ASIP* mutations block *MC1R* signalling and lead to the production of red  
83 pheomelanin [24, 25]. Epistatic interaction of those two genes modulates wool color in an creole sheep  
84 breed [26]. Moreover, strong synergistic interactions have also been highlighted for other color traits  
85 such as skin/hair pigmentation in humans for which an interaction between *HERC2* and *MC1R* has been  
86 shown significantly associated [23].

87 In the European rabbit (*Oryctolagus cuniculus*), different coat colors have been selected through  
88 domestication and are nowadays fixed in specific breeds. Therefore, candidate gene approaches have  
89 allowed the identification of various mutations responsible of different phenotypes such as the dilution  
90 of the coat color [27] or the brown phenotype [28]. In rabbits, six loci (called A for Agouti, B for Brown,  
91 C for Color, D for Dilution, E for Extension and En for English Spotting) are involved in the coloration  
92 of the coat (Table 1). Notably, allelic heterogeneity with dominance/recessivity relations exists between  
93 different mutations within the single loci, resulting in distinct phenotypes. For instance, at the C locus  
94 (*TYR*), the  $C^{ch}$  mutation, responsible of the chinchilla phenotype, is dominant over the  $C^h$  mutation, itself  
95 associated with himalayan coat coloration which is dominant over the  $c$  mutation leading to albino  
96 phenotype [29] (Table 1). In addition, epistatic effects between both Extension and Agouti loci have  
97 been shown from a cross between a Champagne d'Argent buck and a Thuringian doe [30].  
98 Although the mutation responsible of the himalayan phenotype has been identified, this trait has always  
99 been described in a simple way without considering both the gradient and the pattern of coloration  
100 occurring within the phenotype. A better insight of the coloration variability requires a fine  
101 characterisation of the phenotype to highlight dominance and/or recessive effects and epistatic  
102 interactions. Here, we propose a genome-wide investigation of coat color of body extremities using the  
103 high-density SNP rabbit beadchip (Affymetrix® AxiomOrcun™ SNP Array) in an experimental  
104 familial design. We (i) identified several significant loci including key genes involved in melanogenesis  
105 (*ASIP*, *MC1R*, *TYR* and *KIT*) but also atypical candidate genes which are processed pseudogenes linked  
106 to ribosomal proteins (*RPS20* and *RPS14*), (ii) highlighted how epistatic phenomena contribute to the  
107 genetic determinism of color variation of body extremities through *ASIP:MC1R* and *KIT:RPS*  
108 interactions regulating light and dark phenotypes, respectively and (iii) determined the recessive  
109 inheritance of the English spotting phenotype likely involving a copy number variation within the *KIT*  
110 gene. Altogether, our results bring new insights into the genetic determinism of the coat coloration  
111 variability emphasizing the key role played by interactions in the establishment of this complex trait.

112

## 113 **Results**

### 114 **• Several loci are significantly associated with coat color of body extremities**

115 Coat color of body extremities was analysed as a quantitative trait with phenotypes numbered from 1 to  
116 6 (called P1 to P6) and ordered from lighter to darker (Fig. 1a). A first exploration of the genetic  
117 determinism of coat color of body extremities was performed using a simple a linear mixed model as  
118 outlined in the Methods section. A group of more than one hundred markers located on chromosome 1  
119 (called Ocu1 for *Oryctolagus cuniculus* 1) showed significant associations, with the best signal for the  
120 SNP AX-146986391 (125,766,001 bp on Ocu1, p-value =  $2.36 \times 10^{-56}$ ) (Fig. 1b, and Additional file 1:  
121 Table S1). Additional significant and suggestive signals located on Ocu3 (AX-147059932, 131,847,470  
122 bp, p-value =  $9.70 \times 10^{-06}$ ), Ocu4 (AX-147169681, 7,186,175 bp, p-value =  $4.84 \times 10^{-06}$ ), and Ocu15 (AX-  
123 146983797, 93,913,201 bp, p-value =  $6.80 \times 10^{-11}$ ) were obtained (Fig. 1b and Additional file 1: Table

124 S1). In addition, groups of variants located on scaffolds GL018754 (AX-147179313, 18,452 bp, p-value  
125 =  $2.83 \times 10^{-06}$ ) and GL018965 (AX-147173908, 86,908 bp, p-value =  $5.49 \times 10^{-05}$ ), here regrouped for  
126 convenience in chromosome Unknown (an arbitrary chromosome that groups together all the scaffolds),  
127 also showed a suggestive association (Fig. 1b and Additional file 1: Table S1).

### 128 ***Two major genes with recessive effects are associated with white and spotting traits***

129 We then focused on best associated markers to decipher how detected genomic regions contribute to the  
130 different coat color of body extremities. Analysis of the genotypic classes for variant Ocu1<sub>AX-146986391</sub>  
131 among the different phenotypic groups showed that all individuals homozygous for the minor allele  
132 were P1 animals. Moreover, among the P1 class, only 5% of the individuals carry an allele 2, in a  
133 heterozygous manner suggesting that this locus, associated to white coat color, segregated with a  
134 recessive inheritance pattern (Additional file 2: Fig. S1a). To test this assumption, we performed  
135 association analyses comparing phenotype 1 (P1) versus the 5 remaining ones under different genetic  
136 models. A unique significant signal on Ocu1 with the best signal using the recessive model (AX-  
137 147087415, 127,829,702 bp, p-value =  $1.30 \times 10^{-300}$ ) was highlighted (Additional file 2: Fig. S1b). The  
138 *TYR* gene is 2 Mb downstream the best associated marker in a region showing high linkage  
139 disequilibrium (LD) (Fig. 1d). Already known mutations located in the *TYR* gene, *c* and *C<sup>h</sup>*, responsible  
140 of albino and himalayan phenotypes, respectively, did not show highest significant signals (Fig. 1d and  
141 Additional file 1: Table S2).

142 In a similar way, an excess of homozygote for the minor allele was observed for the best associated  
143 marker (Ocu15<sub>AX-146983797</sub>) located on Ocu15 (Additional file 2: Fig. S2a), suggesting that the light  
144 spotted color corresponding to phenotype P2 is mainly a Mendelian trait. We carried out a GWAS  
145 comparing phenotype 2 (P2) to combined light to dark brown extremities-colored rabbits (P3 to P6),  
146 excluding phenotype 1 (P1). The association signals for phenotype 2 was explained by variants of the  
147 chromosome 15 and scaffold GL018754 with the best p-values under a recessive model (Ocu15<sub>AX-  
148 146983797</sub>, 93,913,201 bp, p-value =  $1.26 \times 10^{-144}$  and GL018754<sub>AX-147115616</sub>, 74,205 bp, p-value =  $1.72 \times 10^{-  
149 37}$ ) (Additional file 2: Fig. S2b). The best associated marker on Ocu15 is located within the *KIT* gene  
150 (Fig. 1f). For the AX-147115616 SNP from scaffold GL018754, it is close to the *GSX2* and *PDGFRA*  
151 genes which are neighbours to the *KIT* gene in many species. This suggests that GL018754 is likely  
152 linked to Ocu15 as also suggested on the LD heatmap (Additional file 2: Fig. S3), and only one signal  
153 should be considered.

### 154 ***Five additional loci account for the remaining coat color of body extremities***

155 To better decipher the molecular architecture of the other four phenotypic groups, we only considered  
156 those individuals (n=620) in further analyses. We used a Bayesian sparse linear mixed model, a more  
157 appropriate method for polygenic traits, allowing to estimate the number of quantitative trait loci (QTL)  
158 explaining the remaining coat color of body extremities. An estimation of 5 to 7 QTLs contributed to  
159 coloration phenotypes 3 to 6 (Additional file 2: Fig. S4a). Importantly, while 50% of the variance in  
160 phenotypes was explained by this model (Additional file 2: Fig. S4b), most of the genetic variance

161 seemed due to QTLs (Additional file 2: Fig. S4c). We summed the sparse probabilities for the SNP  
162 inclusion on sliding windows containing 20 SNPs to amplify the identified signals from single variants  
163 (Additional file 2: Fig. S4d).

164 Two loci with large effects of approximately 0.6, located on Ocu1 and scaffold GL018965, showed high  
165 probabilities of being QTLs (70% and 78%, respectively). The *MC1R* gene belongs to the scaffold  
166 GL018965. Some known mutations within *MC1R* did not segregate in this population (japanese and  
167 extension alleles), but the best signal (AX-147194100) on GL018965 corresponded to the black  
168 dominant E<sup>d</sup> mutation of the *MC1R* gene (Fig. 1g and Additional file 1: Table S2). Concerning the novel  
169 position on Ocu1 (AX-146995791), it matches to a gene-poor region on the OryCun2.0 genome  
170 assembly, and does not seem linked to any other region of interest. The closest genes are *RPS14*  
171 pseudogene (Ribosomal Protein S14, ENSOCUG00000026323), *RPS27* pseudogene (Ribosomal  
172 Protein S27, ENSOCUG00000024168), and *RORB* (RAR Related Orphan Receptor B). Two additional  
173 QTLs, located on Ocu1 and Ocu4, showed intermediate probabilities (36% and 55%, respectively), but  
174 also large effects of 0.9 and 0.4, respectively. The highlighted region on Ocu1 spanned the *TYR* locus  
175 and signal located on Ocu4 is approximately 1.5 Mb downstream the *ASIP* gene with a long structure of  
176 LD as previously shown for Ocu1 (Fig. 1e). Although several variants within *ASIP*, including the agouti  
177 *a* marker, were genotyped, they did not have the best p-values (Fig. 1e and Additional file 1: Table S2).  
178 Finally, 2 novel QTLs, located on Ocu13 and Ocu14, showed a trend of being QTLs with a probability  
179 above 15% for both and a large effect of 0.7 for the QTL on Ocu14. A few annotated genes  
180 (ENSOU00000027919, ENSOU0000000698, ENSOU00000025838 and  
181 ENSOU00000032896) including *RPS20* pseudogene (Ribosomal Protein S20,  
182 ENSOCUG00000025838) belong to the Ocu14 genomic region.

183 To fine-map intervals of interest, we used a Bayesian method considering the sum of the single-effects  
184 particularly well-suited to settings where variables are highly correlated and detectable effects are  
185 sparse. We validated 5 out of the 6 identified regions (exception of the Ocu13 locus) (Fig. 2a) and fine-  
186 mapped them in minimal Credible Set (CS) (Additional file 1: Table S3). One CS contained one SNP  
187 (AX-146995791) and the 4 others contained between 16 and 61 markers, with interval sizes ranging  
188 from 430 Kb to 2.2 Mb. The scaffold GL018965 was highlighted within a CS including also the scaffold  
189 GL018998 (Additional file 1: Table S3). While the region on GL018965 contained the Extension locus  
190 characterised by the *MC1R* gene, the interval on GL018998 pinpointed towards the *ANKRD11* gene.  
191 Homologous regions in human or mice highlighted the *MC1R* gene 600 Kb downstream the *ANKRD11*  
192 gene confirming that both scaffolds GL018998 and GL018965 might be linked, as confirmed by the LD  
193 heatmap (Fig. 1g). A unique CS of markers was identified on Ocu14 regrouping 2 groups of markers  
194 located more than 25 Mb away on the chromosome (Additional file 1: Table S3). Although these two  
195 groups of markers are located apart on the draft, linkage analysis using the familial meiosis of our  
196 pedigree indicates that these two groups are linked. A local genetic map could thus be established  
197 (Additional file 1: Table S4).

198 To likely identify candidate genes belonging to novel highlighted Ocu1 and Ocu14 intervals, we  
199 analysed publicly available RNA-seq data extracted from skin of rabbits including a generic sample  
200 (accession number SAMN00013655), Rex black rabbit (accession number SAMN02693835), Rex white  
201 rabbit (accession number SAMN02693836) and Rex chinchilla rabbit (accession number  
202 SAMN02693834). Only 5 annotated genes (2 and 3 in Ocu1 and Ocu14 genomic regions, respectively)  
203 were quantified in skin (Fig. 2b). It occurred that the three *RPS* pseudogenes (*RPS14* -  
204 ENSOCUG00000026323, *RPS27* - ENSOCUG00000024168 and *RPS20* - ENSOCUG00000025838)  
205 looked like processed pseudogenes since they all carried both START and STOP codons in the  
206 OryCun2.0 genomic reference sequence. While 8 and 10 pseudogenes of *RPS14* and *RPS20*,  
207 respectively are sparse in the rabbit genome, only the two copies located on Ocu1 and Ocu14,  
208 respectively are processed pseudogenes carrying the transcription initiation and ending codons (Fig. 2c).  
209 All of them were expressed in the skin tissue of the generic rabbit sample (Fig. 2b). Despite the lack of  
210 statistics between the three samples of skin of Rex rabbits (black vs. white vs. chinchilla), less reads  
211 mapped to both *RPS14* and *RPS20* processed pseudogenes in the black Rex rabbit (Fig. 2d).

212

#### 213 • Gene-gene interactions contribute to the determinism of coat color of body extremities

214 To assess whether specific interactions accounted for the variability of coat color of body extremities,  
215 we first evaluated pairwise genotypic distribution across the 6 phenotypic groups (P1 to P6) between  
216 the 7 selected markers from previous analyses (AX-146995791 (Ocu1<sub>*RPS14*</sub>), AX-147087415 (Ocu1<sub>*TYR*</sub>  
217 [P1]), AX-147073566 (Ocu1<sub>*TYR*</sub> [P3 to P6]), AX-147097074 (Ocu4<sub>*ASIP*</sub>), AX-147006836 (Ocu14<sub>*RPS20*</sub>),  
218 AX-146983797 (Ocu15<sub>*KIT*</sub>), and AX-147194100 (GL018965<sub>*MC1R*</sub>). Significant interactions between  
219 variants located on Ocu1 likely reflecting linkage were identified (Fig. 3a and Additional file 1: Table  
220 S5). Significant epistasis were also highlighted between best markers of Ocu15<sub>*KIT*</sub> and Ocu14<sub>*RPS20*</sub> (p-  
221 value = 0.0156) and a trend was observed for Ocu4<sub>*ASIP*</sub>:Ocu14<sub>*RPS20*</sub> (p-value = 0.08127) and  
222 Ocu4<sub>*ASIP*</sub>:GL018965<sub>*MC1R*</sub> (p-value = 0.1056) (Fig. 3a and Additional file 1: Table S5).

223 We then built a classification tree based on the genotypes at each marker of this set of 7 markers, to  
224 apprehend epistasis between the different loci and genotypes-phenotypes relationships (Fig. 3b). As  
225 expected, Ocu1<sub>*TYR*</sub> and Ocu15<sub>*KIT*</sub>, were found as major genes responsible of white (P1) and spotted (P2)  
226 phenotypes, respectively. For the remaining phenotypic groups, approximately 28% (13/47), 31%  
227 (39/125), 65% (125/193) and 72% (183/255) of individuals seemed correctly classified for phenotypes  
228 P3, P4, P5 and P6, respectively (Fig. 3b). While P3 and P4 phenotypes seem mostly explained by  
229 interaction between Ocu4<sub>*ASIP*</sub> and GL018965<sub>*MC1R*</sub>, interactions between both loci involving *RPS*  
230 processed pseudogenes, Ocu1<sub>*RPS14*</sub> and Ocu14<sub>*RPS20*</sub>, seemed involved in darker P5 and P6 phenotypes  
231 (Fig. 3b).

232 To disentangle the most significant genetic components including gene-gene interactions that contribute  
233 to the determinism of coat color of body extremities, we used the Bayesian selection criterion BIC to  
234 select significant interactions in a stepwise procedure applied to linear regression models. Since

235 phenotypes P1 and P2 seemed exclusively explained by *Ocu1<sub>TYR</sub>* and *Ocu15<sub>KIT</sub>* major genes, we  
236 considered only phenotypes P3 to P6 but incorporated in our genetic model all possible combinations  
237 between the set of 7 selected variants. The best returned model included the different markers as main  
238 effect with the most significant positive effects for *Ocu4<sub>ASIP</sub>*, *Ocu14<sub>RPS20</sub>* and *GL018965<sub>MC1R</sub>*.  
239 Significant epistasis were highlighted with the most significant effect for the *Ocu4<sub>ASIP</sub>:GL018965<sub>MC1R</sub>*  
240 interaction with a negative effect on phenotypes (Additional file 2: Fig. S5). In addition, *Ocu15<sub>KIT</sub>*  
241 showed significant epistatic effects with both *Ocu1<sub>TYR</sub>* and ribosomal genes *RPS* processed pseudogenes  
242 (Additional file 2: Fig. S5).

243 Finally, we considered epistasis between 6 of the 7 markers and the rest of the genome to analyse with  
244 a wide angle the coloration genes network. Only one variant, AX-147073566, was considered for  
245 *Ocu1<sub>TYR</sub>* since both selected markers (AX-147073566 and AX-147087415) are very close. We  
246 performed pairwise epistasis tests using an adaptive shrinkage method estimating both local false sign  
247 rates (lfsr) and effect sizes, adapted to limited sample size for increasing statistical power [31]. The best  
248 interactions with a  $lfsr < 10^{-03}$  are shown on the Fig. 3c. Approximately 570 significant interactions were  
249 obtained with more than 85% of those involving *Ocu4<sub>ASIP</sub>* and *GL018965<sub>MC1R</sub>* markers with clusters of  
250 variants between each other (Additional file 1: Tables S6-S9). The best significant effect was observed  
251 for *Ocu4<sub>ASIP</sub>:GL018965<sub>MC1R</sub>* interaction (5,857,504 bp on *Ocu4* and 400 Kb away to the *ASIP* gene,  $lfsr$   
252 =  $1.33 \cdot 10^{-10}$ ) with a similar effect to the previously one observed (Additional file 1: Table S8 and  
253 Additional file 2: Fig. S5). Interestingly, several novel highlighted epistatic interactions pinpointed to  
254 genomic regions spanning genes involved in coloration pathways or pigmentation linked disorders, such  
255 as *HPS5*, *POT1*, *TTC8*, *SPATA7* or likely *SLC24A4*, *CERKL*, *PSKH2* and *SLC7A13* that are less than  
256 500 Kb away (Fig. 3c and Additional file 1: Tables S6-S9).

257

#### 258 • A copy number variation likely overlaps the *Ocu15<sub>KIT</sub>* locus

259 Since several known mutations, located within genomic regions of interest, did not show best significant  
260 signals, we searched for CNV. We focused our research of CNV to regions spanning previously intervals  
261 identified as associated to phenotypes. Instead of the characterization of individual structural variants,  
262 we analysed the mean value of LRR (Log R Ratio) and BAF (B Allele Frequency) at each SNP of the  
263 region in the different phenotypic groups. For *Ocu15<sub>KIT</sub>*, aberrant values of means of LRR, ranging  
264 below -0.97 and above 0.57, were observed for spotted rabbits (phenotype P2) in an interval containing  
265 the *KIT* gene, which referred to several markers that can then be considered as involved in a CNV (Fig.  
266 4a). In addition, the distribution of BAF values for all individuals of the experimental design, not only  
267 the spotted colored rabbits, showed a typical profile of a CNV since we detected many values outside  
268 the expected 0, 0.5 and 1 categories (Fig. 4a). This suggests that the CNV affecting the *KIT* gene  
269 segregated within the whole protocol. The CNV seemed to affect the *KIT* gene as shown for 1 marker  
270 located within the gene for which the signal intensity seemed different between both alleles and  
271 additional groups of genotypes might be deduced (Fig. 4b). A similar pattern was observed for 5 markers



272 located within the *KIT* gene suggesting a CNV of at least 5 Kb (93,911,613 bp - 93,916,801 bp) affecting  
273 the 5 last exons of the gene including the STOP codon. A GWAS using individual LRR values as  
274 markers and comparing spotted colored animals (P2) to combined all others extremities-colored rabbits  
275 except P1 showed a significant signal on Ocu15 in the interval containing the *KIT* gene (Fig. 4c).

## 276 **Discussion**

### 277 *Effect of known genes and/or mutations on the coat color of body extremities*

278 The interval located on *Ocu1* contains the *TYR* gene, which is an essential enzyme of the melanin  
279 biosynthesis from the tyrosine within melanosomes [9]. Regarding the Himalayan  $C^h$  allele, it perfectly  
280 discriminated white rabbits from all other individuals with coat color at their body extremities.  
281 Surprisingly, for the white phenotype (called P1), the best association signal under the recessive model  
282 was obtained for AX-147087415 instead of the Albino *c* allele (AX-146982536). Indeed, 4 individuals  
283 classified in phenotype P1 are heterozygous for this known allele. Additional manual genotyping for  
284 this variant showed genotyping errors from the SNP array with 2 out of 4 animals homozygous for the  
285 Albino *c* allele. The remaining 2 incoherent rabbits are likely phenotypic errors. This may confirm the  
286 causal effect of this mutation on the genetic determinism of the white coat coloration [29].

287 Interestingly, markers located within the genomic region spanning the *TYR* locus also showed  
288 association signals when only phenotypes P3 to P6 were considered. The LD structure measured in this  
289 region suggested the segregation of two distinct haplotypes with significant p-values. The haplotype  
290 carrying the region upstream the *TYR* gene may likely been involved in the variability of coat color of  
291 body extremities under an additive determinism. As observed on the classification tree, heterozygosity  
292 at the *Ocu1*<sub>*TYR*</sub> seemed more correlated with lighter P3 and P4 phenotypes while homozygosity for the  
293 major allele seemed more represented within darker P5 and P6 groups of rabbits. In a conditional and  
294 reversible gene expression knockdown mouse model, the authors showed that *TYR* was necessary not  
295 only for the synthesis of melanin, but also for the complete maturation of the stage IV melanosome [32].  
296 This system where the *TYR* protein was depleted at a level that was sufficient to alter coat color but not  
297 sufficient to significantly alter melanin accumulation, likely suggested the potential effect of an  
298 additional genetic variation at the *TYR* locus [32]. In accordance with these observations, our results  
299 complicate a little more the molecular basis and allelic series imbalance of the coloration *C* locus.

300 The *KIT* receptor is also a key regulator activating the synthesis of eumelanin through the MAPK  
301 signalling pathway [9]. We figured out a structural variant spanning the *KIT* gene, a CNV of at least 5  
302 Kb affecting the 5 last exons of the gene including the STOP codon, might contribute to the P2  
303 phenotype (white rabbits with coloration at their body extremities except their noses, also considered as  
304 spotted phenotype). The *KIT* gene has been described in several species associated with coloration traits,  
305 especially with white spotting phenotype in cats [33], donkeys [34], camels [35], horses [36] and English  
306 spotting phenotype in rabbits [37]. In addition, structural variants involving *KIT* have been identified  
307 and associated with white spotting phenotypes such as in horses in which a heterozygous 1.9 Kb deletion  
308 affecting exons 10-13 of the *KIT* gene represented a true null allele responsible of the depigmentation  
309 phenotype [38]. Although an accurate characterization of the structural variant affecting the *KIT* gene is  
310 needed, our results strongly suggest that a CNV within the *KIT* gene is the causal mutation of the English  
311 spotting phenotype in rabbits [37].

312 The region on Ocu4 spans the *ASIP* gene, a signalling ligand initiating the synthesis of pheomelanin  
313 pigment through its binding to the MC1R receptor [9]. In many species, the *ASIP* gene is involved in  
314 coloration traits with the most known is the agouti phenotype [39]. In rabbits, the causal mutation  
315 disrupting the protein discriminates between full and a dual coloration due to the expression of  
316 pheomelanin [30]. Here, results focusing on the *ASIP* locus are less clear since the best association signal  
317 was located more than 1 Mb downstream the agouti *a* marker with an intermediate level of LD  
318 suggesting another variants involved in the light coat color of body extremities (phenotypes P3 and P4).  
319 However, aberrant BAF values focused on the *ASIP* gene might suggest a CNV spanning the *ASIP* gene  
320 but LRR values did not seem confirming it (data not shown). More and more studies have highlighted  
321 structural variants encompassing or close to the *ASIP* gene and associated with coat colored phenotypes  
322 in different domestic species [40, 41]. Indeed, a 11 Kb deletion affecting the *ASIP* gene was the most  
323 likely variant for the black and tan phenotype in rabbits [42]. In addition, populations analyses  
324 performed in livestock have shown that copy number variants underlying breed-defining coat color  
325 phenotypes revealed selection signatures [43]. Although complementary experimentations are needed  
326 to deeper characterize the mutation at the *ASIP* locus, our results suggested additional allelic  
327 heterogeneity at the coloration A locus in rabbits.

328 The genomic region carrying the *MC1R* gene is also associated with coat color of body extremities in  
329 our experimental design. While the binding of the  $\alpha$ -MSH peptide on MC1R allows the synthesis of  
330 eumelanin *via* the cAMP signaling pathway, the *ASIP* peptide has an antagonist effect blocking the  
331 biosynthesis of eumelanin in favour of pheomelanin production [24, 25]. Although black and japanese  
332 alleles were genotyped [44, 45], only the black dominant E<sup>d</sup> allele segregated within our experimental  
333 design and was the best associated marker with coat color traits. Only 2 haplotypes spanning the whole  
334 GL018965 scaffold have been identified throughout the experimental design (data not shown) clearly  
335 suggesting either the causal role of the E<sup>d</sup> allele or an additional mutation within the same haplotype. In  
336 contrary to both *ASIP* and *KIT* loci, very few examples of CNV have been identified involving the *MC1R*  
337 gene [46]. Here, searching for structural variants was not appropriate given that *MC1R* is located within  
338 a scaffold containing a low number of variants. However, given the LD structure within the region,  
339 identifying and discriminating between several variants may remain challenging for the *MC1R* locus.

340

#### 341 ***Processed pseudogenes of ribosomal proteins are likely involved into the coat color of body extremities***

342 More importantly, two regions, Ocu1<sub>RPS14</sub> and Ocu14<sub>RPS20</sub>, also account for the molecular architecture  
343 of the coat color of body extremities. Both regions contain few annotated genes on the OryCun2.0  
344 genome and only some of them are expressed in the skin. Three of them belong to the 40S ribosomal  
345 proteins which are likely the *RPS14*, *RPS27* and *RPS20* genes, respectively, by sequence homology.  
346 The three ribosomal genes located within intervals of interest looked like pseudogenes which is very  
347 common for ribosomal genes in several species [47, 48]. Approximately 30 *RPS* genes and 100 *RPS*  
348 pseudogenes are dispersed in mammalian genomes [49, 50]. In addition, analyses performed from

349 publicly available RNA-seq data obtained from skin including a generic sample, a Rex black, a Rex  
350 white and a Rex chinchilla rabbit highlighted quantification of messengers from both *RPS14* and *RPS20*  
351 processed pseudogenes. The study of Tonner et al. detected transcription of ribosomal protein  
352 pseudogenes in diverse human tissues from RNA-seq data [51]. Unlike *RPS* genes that are constitutively  
353 expressed in almost all tissues, *RPS* pseudogenes are differentially expressed, suggesting that they may  
354 contribute to tissue-specific biological processes [50]. Two studies carried in mice [31] and zebrafish  
355 [53] showed coloration defects when mutations in *Rps20* and *Rps14*, respectively, were induced. Indeed,  
356 a study in mice reported 2 mouse dark skin (*Dsk*) loci caused by mutations in *Rps19* and *Rps20* with a  
357 common signalling pathway through the stimulation of Kit ligand (*kitl*) expression by p53 [54]. Hence,  
358 a ribosome defect in keratinocytes may mimic ultraviolet response to keratinocytes resulting in a p53  
359 induction in these cells that may drive melanocytes proliferation/migration *via* *kitl* signalling; this may  
360 lead to an hyperpigmentation tanning response [55, 56]. In addition, deficiency in *rps14* in zebrafish led  
361 to a delayed pigmentation through an increase of p53 activity [53]. Moreover, the comparison of the  
362 transcriptional profiles of human cell lines of dark and light melanocytes under basal conditions and  
363 following ultraviolet-B irradiation showed an interaction between ribosomal proteins and the p53  
364 signalling pathway [52]. Although deeper sequencing analyses of both DNA and RNA are needed to  
365 consolidate our assumption, our results in the light of the literature suggested ribosomal genes especially  
366 *RPS20* and *RPS14* processed pseudogenes, as pertinent and novel candidate genes likely involved in the  
367 genomic basis of coat coloration.

368

### 369 ***Epistatic network contributes to the genetic determinism of the coat color of body extremities***

370 Here, we analysed the color variation of body extremities as a continuous trait allowing a better  
371 understanding of gene-gene interactions involved in the molecular architecture of the trait. The global  
372 overview of the coat color of body extremities determinism in our rabbit model showed the existence of  
373 an epistatic interaction network involving core genes but also likely additional genes with small effects  
374 (Fig. 5). Our results suggested that (i) *Ocu1<sub>TYR</sub>* seemed to dictate whether pigmentation is produced or  
375 not and when the coloration occurred, it is restricted to body extremities, (ii) interactions among the  
376 others genes (*Ocu1<sub>RPS14</sub>*, *Ocu4<sub>ASIP</sub>*, *Ocu14<sub>RPS20</sub>* and *GL018965<sub>MC1R</sub>*) seemed to dictate the amount of  
377 pigment produced and (iii) *Ocu15<sub>KIT</sub>* seemed to control where pigment is deposited, all body extremities  
378 or restricted to some extremities (Fig. 5).

379 The most significant epistatic interaction identified from the various analyses is between both markers  
380 tagging *ASIP* and *MC1R* loci. Epistasis involving those genes has already been described in mice [13,  
381 57], human [17], sheep [58] but also in rabbits from a cross between a Champagne d'Argent buck and  
382 a Thuringian doe [30]. Interactions have been associated with color variation particularly in Creole sheep  
383 where it has clearly been showed from analyses of phenotypes segregation through families crosses that  
384 a functional wild-type genotype at *MC1R* locus is needed for the manifestation of the effects of the  
385 duplicated allele at the *ASIP* gene [58]. Although highlighting epistasis remains challenging,

386 understanding the functional role of the interaction at the molecular level affecting phenotypes is still  
387 more complex. Consequence of *ASIP:MC1R* genetic interaction is straightforward since both proteins  
388 act within the same signalling pathway with ASIP being an antagonist ligand which competes with  $\alpha$ -  
389 MSH for binding on its MC1R receptor. Here, significant positive effects from both individual AX-  
390 147097074 (*Ocu4<sub>ASIP</sub>*) and AX-147194100 (*GL018975<sub>MC1R</sub>*) markers were identified suggesting likely  
391 gain of function mutations. In contrary, epistasis seem to have a negative effect on coat coloration since  
392 combination of both variants is mainly associated with light colored rabbits harbouring cream/beige coat  
393 pigmentation (P3 and P4 phenotypes) (Fig. 5).

394 Our results highlighted suggestive interactions between ribosomal processed pseudogenes themselves  
395 and *KIT* genomic regions. Although the involvement of ribosomal genes especially *RPS20* and *RPS14*  
396 processed pseudogenes needs to be assessed with further experiments, epistasis with those genes and its  
397 impact on pigmentation seemed consistent with knowledge [53, 54]. As previously mentioned,  
398 deregulation of Rps20 in mice has been shown to activate the Kit signalling pathway through p53  
399 activation mimicking the tanning response responsible of the hyperpigmentation of animals [55] and  
400 inactivation of rps14 in zebrafish delayed pigmentation process also via an increase of p53 activity [53].  
401 Our results demonstrating that both individual and combined effects of *RPS* and *KIT* loci affected rabbits  
402 with dark coat color of body extremities (P5 and P6 phenotypes) (Fig.5).

403 Beside epistasis highlighted between the hub genes involved in the determinism of coat coloration, we  
404 also pinpointed a denser interaction network including several genes, that are known to affect the  
405 pigmentation process. A significant interaction was identified between *Ocu4<sub>ASIP</sub>* locus and a part of the  
406 scaffold GL018733, in which the Heat Shock Protein 5 (*HPS5*) gene is located. Mutations within this  
407 gene altered melanosome biogenesis and have been associated with hypopigmentation specific of  
408 oculocutaneous albinism [59, 60] and Hermansky-Pudlak Syndrome [60, 61]. The built network also  
409 figured out *POT1* (The Protection Of Telomeres 1 protein) and *CERKL*, (Ceramide Kinase Like) located  
410 on *Ocu7*, significantly interacting with *GL018965<sub>MC1R</sub>* locus. POT1 encodes a nuclear protein involved  
411 in telomere maintenance. Several human genetics study carried out in different ethnic groups have  
412 characterised mutations responsible of skin melanoma [62–64] making POT1 a major driver of this  
413 human disease as reviewed in [65, 66]. The remaining genes that showed epistasis with one of the  
414 significant locus (*Ocu1<sub>RPS14</sub>*, *Ocu1<sub>TYR</sub>*, *Ocu4<sub>ASIP</sub>*, and *GL018965<sub>MC1R</sub>*) are retinal pigment related proteins  
415 such as *SLC7A13* (Solute Carrier Family 7 Member 13) [67, 68]. But more importantly, deregulation  
416 of many of them have been associated with retinal pigmentation disorders. Indeed, *CERKL* [69–71],  
417 *SPATA7* (Spermatogenesis Associated 7) [72–75] and *TTC8* (Tetratricopeptide Repeat Domain 8) [76,  
418 77] have all been involved in retinitis pigmentosa which corresponds to a dysfunction and degeneration  
419 of both photoreceptors and retinal pigment endothelial cells.

420

421

422

423 **Conclusions**

424 To conclude, our results bring new insights into the molecular architecture of the coat color of body  
425 extremities pinpointing the key role played by interactions in the establishment of this complex trait.  
426 The characterisation of a genome-wide epistatic network might significantly contribute to a better  
427 understanding of underlying mechanisms. Moreover, divergences in the relationships between  
428 phenotypes and genotypes have been described in different breeds pointing out the functional effect of  
429 specific combination of alleles. Future studies through deeper analyses from sequencing data might lead  
430 to an allele-specific network considering also their dominance/recessivity or copy numbers.

431

432

## 433 **Methods**

### 434 • **Animal data**

#### 435 *The experimental design*

436 The experimental rabbit populations were issued from the INRA 1001 line [78] and bred in the INRAE  
437 experimental farm (UE PECTOUL, Toulouse, France) in accordance with the national regulations for  
438 animal care and use of animals in agriculture. The experimental population was a combination of two  
439 genetically related lines: the G10 line, selected for 10 generations for decreasing Residual Feed Intake  
440 (RFI) [79] and the G0 control line produced from frozen embryos of the ancestor population of the  
441 selected line. The 296 G10 and 292 G0 rabbits were produced in the same 3 batches with a 42 days  
442 interval. In each batch, half of the kits was fostered to G0 does and the second half was fostered by G10  
443 does. Does adopted alternatively kits from one line and from the other line in successive batches. At  
444 weaning (32 days), in each batch, kits were placed in individual cages. More details about the  
445 experimental cross can be found in Garreau et al. [80] but briefly, the initial design included 832 rabbits  
446 including the 20 bucks, 101 does and 711 offspring. Although the experimental cross was not especially  
447 designed for evaluating coloration traits, we took advantage of it since the G0 line originated from  
448 Californian rabbits and we observed within the experimental cross a segregation for both color and  
449 pattern variability within the himalayan phenotype. The final design, based on phenotypic evaluation is  
450 detailed further and on Additional file 2: Fig S6.

#### 451 *Phenotypic data and quality control*

452 We first distinguished 5 different rabbit color groups (from white to dark chocolate) by visual inspection  
453 of the whole population. This notation was performed by 2 independent experimenters. Colors were  
454 classified as A, B, C, D and E. Secondly, we selected a few individuals (n=15 per classified group) that  
455 were phenotyped for their nose coloration using a colorimeter to validate our subjective classification.  
456 A significant correlation was observed between the luminescence (L\*) measurement and the notes  
457 (Additional file 2: Fig. S6a), validating the determined groups. Moreover, an additional group was  
458 created since some animals from class A had colored ears but white noses. Altogether, 6 ordered  
459 phenotypes were defined, sorted from P1 to P6 and numbered 1 to 6 for further quantitative analyses  
460 (P1=1, P2=2, P3=3, P4=4, P5=5, P6=6). In total, 686 rabbits out of the 832 of the whole experimental  
461 design were assigned to one phenotypic group, including 574 offspring, 20 bucks and 92 does, with 2  
462 to 50 offspring per buck and 1 to 15 offspring per doe (Additional file 2: Fig. S6b). Number of rabbits  
463 per phenotype were 34, 32, 47, 125, 193 and 255 for P1, P2, P3, P4, P5 and P6, respectively (Additional  
464 file 2: Fig. S6c).

#### 465 *Sampling collection and DNA extraction*

466 Ear punch biopsies were collected in Allflex Tissue Sampling Unit tube (Allflex France, Vitré, France)  
467 and genomic DNA was extracted from samples with a home-made protocole: proteinase K lysis  
468 following by salt-based DNA extraction and ethanol precipitation. Briefly, ear punch biopsies were  
469 digested at 56°C for 3h using a 500µL solution including 10mM Tris HCl, 0.1M EDTA pH=8, 0,5%

470 SDS and 0.2mg proteinase K. After overnight incubation at 37°C, 1/3 volume of saturated (6M) NaCl  
471 were added and slightly mixed before a centrifugation step (30min at 4°C and 21,000g). The supernatant  
472 was mixed with 2 volumes of 100% ethanol. DNA was retrieved and resuspended in classic buffer for  
473 1h at 60°C before an overnight resuspension at 37°C. Total genomic DNA was quantified using the  
474 Nanodrop 8000 (ND8000LAPTOP, Thermo Fisher Scientific, USA) and the Qubit2.0 (Q32866, Life  
475 Technologies, USA).

#### 476 ***Genotyping data and quality control***

477 The DNA samples were genotyped at the Centro Nacional de Genotipado (CeGen) platform (Santiago  
478 de Compostela, Spain) using the Affymetrix® AxiomOrcun™ SNP Array as recommended by the  
479 manufacturer. The SNP array contains 199,692 molecular markers spanning both chromosomes and  
480 scaffolds. The order of the SNPs was based on the Rabbit OryCun2.0 assembly released by the Broad  
481 Institute of MIT and Harvard [81]. Missing data imputation and haplotype phasing were performed with  
482 the software FImpute [82]. The SNP data were then filtered based on minor allele frequencies  $\geq 0.005$   
483 leading to a final SNP dataset of 162,070 markers for association analyses. The other standard filtering  
484 were not applied in primo-analyses to not eliminate markers that could pinpoint structural variants.  
485 However, the quality (call rate (95%), call freq (95%), Hardy-Weinberg disequilibrium ( $10^{-06}$ )) of  
486 highlighted variants lying within intervals of interest were checked *a posteriori* to secure our results  
487 especially for epistasis analyses. Additional 12,640 SNP were excluded for genome-wise epistasis study.  
488 Additional manual genotyping of 5 variants, included 4 known mutations (*ASIP* - allele a, *TYR* - alleles  
489 c and C<sup>h</sup> and *MC1R* - allele Ed) and another variant for *ASIP* - 5435370 bp. Briefly, variants that were  
490 a SNP were genotyped either using RFLP PCR (*TYR* - alleles c and C<sup>h</sup>) or allele-specific PCR (*ASIP* -  
491 5435370 bp) while variants corresponding to deletions were genotyped using Capillary Electrophoresis  
492 (*ASIP* - allele a and *MC1R* - allele Ed and e). Primers and PCR conditions used are presented in  
493 Additional file 1: Table S9. Briefly for RFLP PCR, PCR were performed with the kit GoTaq® Flexi  
494 (Promega, USA) using 20 ng DNA, 0.5 mM of primers, 0.2 mM dNTPs (Promega, USA), 1X buffer,  
495 1.5mM MgCl<sub>2</sub> et 0.25 U Taq in a final volume of 12  $\mu$ L. Digestions were performed with NciI I et  
496 BsaXI (NEB, USA) for *TYR* - alleles c and C<sup>h</sup>, respectively, using 2U of enzyme and 1X of their  
497 respective buffer before incubation at 37°C for 15 min. The PCR and digestion were performed on  
498 thermocycleur Verity (Thermo Fisher Scientific, USA) and PCR products were loaded on a 2.5%  
499 agarose gel with ethidium bromide. Briefly for allele-specific PCR, we used the KASPAR (Kompetitive  
500 Allele Specific PCR) (KBioscience, United Kingdom) technology. Amplification was performed with  
501 10 ng DNA, 1X PCR buffer, 1.8 mM MgCl<sub>2</sub>, 0.2 mM dNTPs, 0.25  $\mu$ M of each fluorescent dye (Fam et  
502 Vic), 0.5 U of Taq polymerase and 12  $\mu$ M for allele-specific primers and 30  $\mu$ M for the common primer  
503 in a final volume of 5  $\mu$ L. We followed provider recommendation for the PCR program, fluorescent  
504 reading was made on a Quant Studio 6 (Thermo Fisher Scientific, USA) and results were analysed with  
505 the software Quant studio Real Time PCR (Thermo Fisher Scientific, USA). Finally, genotyping using  
506 capillary electrophoresis were performed on a ABI3730™ (Applied Biosystems, USA). The PCR were



507 performed with 0.1 mM of the extended primer, 0.15 mM of the hybridization primer carrying the dye  
508 and 0.15 mM of the reverse primer. The other conditions of PCR and cycle are similar to the RFLP PCR.  
509 PCR products were loaded on the ABI3730™ after a first step of 1/20 dilution and 2  $\mu$ L of the dilution  
510 were mixed with formamide and size standard GeneScan-600Liz Size Standard (Applied Biosystems,  
511 USA) before a denaturation step at 94°C for 5 min. Analyses were performed with GeneMapper™  
512 Software (Applied Biosystems, USA).

### 513 *RNA-seq alignments*

514 Publicly available RNA-seq raw data from back skin of rabbits were uploaded to perform alignment,  
515 quantification and transcript discovery with statistics. Three Rex rabbits with black or white or chinchilla  
516 back skin were considered. Accession numbers for BioSample  
517 (<https://www.ncbi.nlm.nih.gov/biosample/>) are SAMN02693835, SAMN02693836 and  
518 SAMN02693834 for black, white and chinchilla, respectively. Accession number for raw data  
519 (<https://trace.ncbi.nlm.nih.gov/Traces/sra/>) are SRR1201255, SRR1201256 and SRR1201257 for black,  
520 white and chinchilla, respectively.

521 Quality controls, alignments and analyses were performed with the open-source nf-core/rnaseq  
522 workflow (<https://nf-co.re/rnaseq>) using the 3.0 version that implemented fastqc 0.11.9 and qualimap  
523 2.2.2 for quality controls and STAR 2.6.1 for the mapping. Paired-end reads were aligned on the  
524 reference OryCun2.0 genome and annotation version Oryctolagus\_cuniculus.OryCun2.0.104.gtf was  
525 used for analyses.

### 526 *Linkage map construction*

527 The netmap option of the netgwas R package  
528 (<https://www.rdocumentation.org/packages/netgwas/versions/1.13>) [83] was used for building a linkage  
529 map of the Ocu14 region since 2 distinct intervals away from 20 Mb were within the same credible set.

### 530 *Copy number variations evaluation*

531 The raw measurements consist of two intensity signals, one for each allele, which are subsequently  
532 transformed into the log-scaled ratio of the observed and the expected intensity (LRR), and the B Allele  
533 Frequency (BAF) which captures the relative contribution from one allele (B) to the fluorescent signal.  
534 While expected values of 0 for LRR reflect normal copy number ( $n=2$  for diploid individuals,  $\log_2(2/2)$ ),  
535 aberrant theoretical values of 0.57 or -1 reflect one copy gain ( $\log_2(3/2)$ ) or loss ( $\log_2(1/2)$ ), respectively.  
536 From BAF values, a BAF value of 0.5 indicates a heterozygous genotype (AB), whereas 0 and 1 indicate  
537 homozygous genotypes (AA and BB, respectively). For example, a single copy number gain is  
538 characterized by 4 theoretical distinct BAF values = 0, 0.33, 0.67 and 1, reflecting AA/AAA, AAB,  
539 ABB and BB/BBB genotypes, respectively. Log R Ratio (LRR) and B Allele Frequency (BAF) were  
540 extracted from the Axiom™ Analysis Suite Software 4.0.3.3 (Thermo Fisher Scientific, USA) using the  
541 Axiom® CNV Summary Tools 1.1 (Thermo Fisher Scientific, USA) after a global analysis of the whole  
542 experimental design. The 8 96-well genotyping plates were analysed simultaneously for an accurate  
543 definition of genotypes clusters since no reference cluster exist for the Affymetrix® AxiomOrcun™

544 SNP Array. However, a large difference in signal intensities between plates for both LRR and BAF  
545 values were observed for 2 of them likely affecting the results for CNV analyses. The LRR values were  
546 normalised after confirming that it was not a biological effect since the 6 phenotypes and all families  
547 were represented on these 2 plates. Results presented here are adjusted LRR values taking the plate  
548 effect into account using the `lm` function in R

549

550 • **Statistical analyses**

551 ***Univariate linear mixed models for association analyses***

552 We used the GEMMA (Genome-wide Efficient Mixed Model Association) software to perform  
553 association analyses. Briefly, GEMMA fits a univariate linear mixed model (LMM) [84] or a Bayesian  
554 sparse linear mixed model using Markov chain Monte Carlo (BSLMM) [85]; both methods control for  
555 population structure.

556 SNP effects were tested with the following univariate animal mixed model LMM [84]:

$$557 \quad \mathbf{y} = \mathbf{W}\boldsymbol{\alpha} + \mathbf{x}\beta + \mathbf{u} + \boldsymbol{\epsilon} \quad \text{with } \mathbf{u} \sim \text{MVN}_n(0, \lambda\tau^{-1}\mathbf{K}) \text{ and } \boldsymbol{\epsilon} \sim \text{MVN}_n(0, \tau^{-1}\mathbf{I}_n)$$

558 where  $\mathbf{y}$  is the vector of phenotypes for a given trait,  $\mathbf{W}$  is the incidence matrix of covariates  
559 corresponding to fixed effects and  $\boldsymbol{\alpha}$  stands for the effects of these covariates,  $\mathbf{x}$  is the vector of allelic  
560 dosages of the genotypes (0, 1 or 2) and  $\beta$  stands for marker size effect,  $\mathbf{u}$  is the random polygenic effect  
561 and  $\boldsymbol{\epsilon}$  is the random residual effect. Additive effects are structured after  $\mathbf{K}$ , the centered relatedness  
562 matrix computed from the genotypes,  $\lambda$  is the ratio between the two variance components and  $\tau$  is the  
563 variance of the residual errors. GEMMA tests the alternative hypothesis  $H1: \beta \neq 0$  against the null  
564 hypothesis  $H0: \beta = 0$  for each SNP in turn, using one of the three commonly used test statistics (Wald,  
565 likelihood ratio or score). In this article, we will only report the p-value associated with the Wald  
566 statistic.

567 In addition to the classical additive model, dominant and recessive models were tested by transforming  
568 allelic dosages of the genotypes into binary genotypes based on the minor allele at each SNP. As  
569 examples, genotypes coded 0, 1, 2 for a given variant (corresponding to homozygosity for the minor  
570 allele, heterozygosity and homozygosity for the major allele, respectively) were recoded either 0, 0, 1  
571 to test for the dominance of the minor allele or 0, 1, 1 to test for the recessivity of the minor allele.

572 Association was concluded as (i) significant at genome-wise level after a Bonferroni correction (0.05 /  
573 162,070 = 3.08\*10<sup>-07</sup>) and (ii) suggestive at chromosome-wise level after a Bonferroni correction (0.05  
574 / n markers on Ocu).

575

576 The SNP effects were also tested with the following Bayesian sparse animal mixed model [85]:

$$577 \quad y = 1_n\mu + \mathbf{X}\beta + \mathbf{u} + \boldsymbol{\epsilon};$$

$$578 \quad \beta_i \sim \pi N(0, \sigma_a^2\tau^{-1}) + (1 - \pi)\delta_0, \quad \mathbf{u} \sim \text{MVN}_n(0, \sigma_b^2\tau^{-1}\mathbf{K}), \quad \boldsymbol{\epsilon} \sim \text{MVN}_n(0, \tau^{-1}\mathbf{I}_n)$$

579 where  $\mathbf{1}_n$  is a n-vector of 1s,  $\mu$  is a scalar representing the phenotype mean,  $\mathbf{X}$  is an n\*p matrix of  
580 genotypes measured on n individuals at p genetic markers,  $\boldsymbol{\beta}$  is the corresponding p-vector of the genetic  
581 marker effects, and other parameters are the same as defined in the standard linear mixed model. In the  
582 special case  $\mathbf{K}=\mathbf{X}\mathbf{X}^T/p$ , the SNP effect sizes can be decomposed into two parts :  $\boldsymbol{\alpha}$  that captures the small  
583 effects that all SNPs have, and  $\boldsymbol{\beta}$  that captures the additional effects of some large effect SNPs. In this  
584 case,  $\mathbf{u} = \mathbf{X}\boldsymbol{\alpha}$  can be viewed as the combined effect of all small effects, and the total effect size for a  
585 given SNP  $i$  is  $\alpha_i + \beta_i$ . To pinpoint signals, we summed the sparse probabilities evaluated from the total  
586 effect size for a given SNP on sliding windows containing 20 SNPs.

### 587 *Fine-mapping of regions of interest*

588 We also used the SuSiE (Sum of Single Effects) model, which corresponds to a new formulation of the  
589 Bayesian variable selection in regression (BVSr) to fine-map the loci [86]. This model fits an Iterative  
590 Bayesian Stepwise Selection (IBSS) algorithm that is a Bayesian analogue of traditional stepwise  
591 selection methods. SuSie produces Posterior Inclusion Probabilities (PIPs) and Bayesian Credible Sets  
592 (CSs) which capture an effect variable allowing the fine-mapping of significant detected regions. The  
593 SuSiE method removes the single causal variant assumption and groups SNPs into distinct association  
594 signals in the analysis, such that it aims to find as many CSs of variants that are required so that each  
595 set captures an effect variant, whilst also containing as few variants as possible.

596 Regions showing either  $-\log_{10}(\text{p-value}) > 6.5$  with the LMM (corresponding to 5% genome-wide  
597 threshold after a Bonferonni correction) or a PIP  $> 0.1$  were consider for further analyses.

### 598 *Linkage disequilibrium pattern of intervals*

599 Each pairwise linkage disequilibrium measure ( $r^2$ ) was computed both using the PLINK 1.9 software  
600 with the `--r2` option ([www.cog-genomics.org/plink/1.9/](http://www.cog-genomics.org/plink/1.9/)) [87] for all the pairs of SNPs of the selected  
601 regions.

### 602 *Epistatic interaction analyses*

603 Epistatic interaction analyses were focused on best variants located within selected regions, that were  
604 identified from the previously described association analyses.

605 A first evaluation of epistasis was performed using the linear regression model implemented in PLINK  
606 1.9 [87] with the `--epistasis` option to fit the model:

$$607 \quad y = \beta_0 + \beta_1 g_A + \beta_2 g_B + \beta_3 g_A g_B$$

608 for each inspected variant pair (A, B), where  $g_A$  and  $g_B$  are allele counts , and  $g_{AGB}$  is the count of common  
609 occurrences of the alleles at the two loci; then the  $\beta$  coefficients are tested for deviation from zero.  
610 Pairwise interaction was tested between each marker of the set of the 7 best associated SNP variants.  
611 Interactions with p-value  $< 0.05$  are considered significant.

612 To determine the best classification of individuals within the 6 phenotypic groups (P1 to P6) given their  
613 combined genotypes at the different selected regions, we built a decision tree using the Classification  
614 And Regression Trees (CART) algorithm [88]. The evaluation criterion of the CART algorithm is the  
615 Gini-index of diversity, which measures how often a random individual in the set would be misranked

616 if its genotypes was randomly assigned according to the distribution of phenotypes in the subset. The  
617 Gini-index of diversity can be calculated by summing the probability of each individual being assigned,  
618 multiplied by the probability that it would be misranked. It reaches its minimum value (zero) when all  
619 individuals in the set are in the same class as the target variable. Moreover, to identify the most likely  
620 epistatic interactions between the selected markers, we used the decision criterion BIC metric. The most  
621 probable model is therefore the one that minimizes the BIC criterion. The stepAIC function in the MASS  
622 package was applied [89].

623 Pairwise epistatic interactions between the set of selected markers from GWAS and the rest of the  
624 genome were also evaluated using the adaptive shrinkage method [31] implemented in the ashR R  
625 package (<https://www.rdocumentation.org/packages/ashr/versions/2.2-47>). This represented  
626 approximately (number of selected variants)\*200,000 tests. Both interaction effect size and  
627 corresponding standard error were thus estimated for each pairwise combination. Those measures were  
628 used with an empirical Bayes approach for large-scale hypothesis testing. This method accounts for  
629 variation in measurement precision across tests in the computation of the effect sizes, and facilitates  
630 their estimation. In addition, instead of p-value, q-value or local FDR, the “Local False Sign Rate” (lfsr)  
631 [31], which refers to the probability of getting the sign of an effect wrong, was computed. The authors  
632 argue that it is a superior measure of significance than the local FDR :

$$633 \quad lfsr_j := \min [ \Pr (\beta_j \geq 0 | \hat{\pi}, \hat{\beta}, s), \Pr (\beta_j \leq 0 | \hat{\pi}, \hat{\beta}, s) ]$$

634 with for effect  $j$ ,  $lfsr_j$ , is the probability that we would make an error in the sign of effect  $\beta_j$  if we were  
635 forced to declare it either positive or negative. Small values of  $lfsr_j$  indicate that we can be confident in  
636 the sign of  $\beta_j$ , which implies that we are confident it has a non-zero value.  $lfsr$  is a more conservative  
637 measure of significance than local FDR and it is more robust to modeling assumptions.

638

#### 639 • Visualisation tools

640 Several software or R packages were used for visualisation of data. Classical plots were built with the  
641 ggplot2 R package (<https://www.rdocumentation.org/packages/ggplot2>) [90], Manhattan and Quantile-  
642 Quantile plots were built using the qqman R package  
643 (<https://www.rdocumentation.org/packages/qqman>) [91]. Decision trees were built with the rpart R  
644 package (<https://www.rdocumentation.org/packages/rpart>) [92]; the Fig. 3b is a concatenation of two  
645 independent decision trees. The circular plot was built using the BioCircos R package  
646 (<https://www.rdocumentation.org/packages/BioCircos>) [93]. Linkage disequilibrium profiles were  
647 visualized with the LDheatmap R package (<https://www.rdocumentation.org/packages/LDheatmap>)  
648 [94]. Mapping of RNA-seq experiments were showed using the Integrative Genome Viewer  
649 (<https://software.broadinstitute.org/software/igv/>) [95].

650

#### 651 Abbreviations

652 BAF B allele frequency  
653 CNV copy number variation  
654 CS credible set  
655 GWAS genome wide association study  
656 LD linkage disequilibrium  
657 LFSR local false sign rate  
658 LRR log R ratio  
659 Ocu *Oryctolagus cuniculus*  
660 PIP posterior inclusion probability  
661 RPE retinal pigment endothelium  
662 SNP single nucleotide polymorphism  
663  
664

665 **Declarations**

666 *Ethics approval and consent to participate*

667 The French ministry of higher education, Research and innovation and the local animal research ethics  
668 committee (C2EA-115) approved the study (approval number 00903.01). All procedures were  
669 conducted in accordance with the French legislation on animal experimentation and ethics. The senior  
670 researchers were authorized by the French Ministry of Agriculture to conduct experiments on living  
671 animals at the INRAE facilities in Toulouse, France (approval number 312011116).

672 *Consent for publication*

673 Not applicable

674 *Availability of data and materials*

675 The datasets (genotypes, phenotypes, pedigrees, LRR values and BAF values) supporting the  
676 conclusions of this article are available in the author personal genologin repository  
677 (<http://genoweb.toulouse.inra.fr/~jdemars/RabbitColoration/>) belonging to the Genotoul Bioinformatics  
678 facility (<http://bioinfo.genotoul.fr/>).

679 *Competing interests*

680 The authors declare that they have no competing interests

681 *Funding*

682 This study has been funded by the European Union's H2020 project Feed-a-Gene under grant agreement  
683 no. 633531, the Genetic Animal division from INRA, and the GenPhySE laboratory.

684 *Authors' contributions*

685 JD analysed data, performed their visualisation and wrote the manuscript, YL performed quality control  
686 and analyses, NI organized sampling and genotyping, AD performed additional polymorphisms  
687 genotyping, SL performed phenotypic measurements and additional genotyping, HG contribute to  
688 statistical analyses and read the manuscript, PA and FB were in charge of animal care and experimental  
689 design, JR set up the project, performed phenotypic measurements and quality control of datasets.

690 *Acknowledgements*

691 We thank all people of the animal facility, who carefully looked after the animals and for their help with  
692 the skin biopsies. We warmly thank Laurence Drouilhet, Bertrand Servin and Alain Vignal and all those  
693 who have contributed directly or indirectly to this work for discussion and support. We also thank both  
694 Centro Nacional de Genotipado (CeGen) (<http://www.usc.es/cegen/>) and GenoToul bioinformatics  
695 (<http://bioinfo.genotoul.fr/>) facilities.

696 *Authors' information (optional)*

697 Not applicable

698

699

## 700 References

- 701 1. Protas ME, Patel NH (2008) Evolution of coloration patterns. *Annu. Rev. Cell Dev. Biol.* 24
- 702 2. Cieslak M, Reissmann M, Hofreiter M, Ludwig A (2011) Colours of domestication. *Biol. Rev.* 86
- 703 3. Cuthill IC, Allen WL, Arbuckle K, et al (2017) The biology of color. *Science* (80-. ). 357
- 704 4. Bennett DC, Lamoreux ML (2003) The color loci of mice - A genetic century. *Pigment Cell Res.* 16
- 705 5. Hoekstra HE (2006) Genetics, development and evolution of adaptive pigmentation in vertebrates. *Heredity* (Edinb). 97
- 706
- 707 6. San-Jose LM, Roulin A (2017) Genomics of coloration in natural animal populations. *Philos. Trans. R.*
- 708 *Soc. B Biol. Sci.*
- 709 7. Pavan WJ, Sturm RA (2019) The Genetics of Human Skin and Hair Pigmentation. *Annu Rev Genomics*
- 710 *Hum Genet.* <https://doi.org/10.1146/annurev-genom-083118-015230>
- 711 8. Bagnara JT, Taylor JD, Hadley ME (1968) The dermal chromatophore unit. *J Cell Biol* 38:.
- 712 <https://doi.org/10.1083/jcb.38.1.67>
- 713 9. Lin JY, Fisher DE (2007) Melanocyte biology and skin pigmentation. *Nature*
- 714 10. Kaelin CB, Xu X, Hong LZ, et al (2012) Specifying and sustaining pigmentation patterns in domestic and
- 715 wild cats. *Science* (80- ) 337:.. <https://doi.org/10.1126/science.1220893>
- 716 11. Pino J, Kos L (2013) MC1R, EDNRB and kit signaling in pigmentation regulation related disorders. In:
- 717 *Skin Pigmentation: Genetics, Geographic Variation and Disorders*
- 718 12. Duhl DMJ, Vrieling H, Miller KA, et al (1994) Neomorphic agouti mutations in obese yellow mice. *Nat*
- 719 *Genet.* <https://doi.org/10.1038/ng0994-59>
- 720 13. Siracusa LD (1994) The agouti gene: turned on to yellow. *Trends Genet.*
- 721 14. Anthony JF Griffiths, Jeffrey H Miller, David T Suzuki, Richard C Lewontin and WMG (2000) An
- 722 *Introduction to Genetic Analysis*, 7th edition
- 723 15. Liu F, Visser M, Duffy DL, et al (2015) Genetics of skin color variation in Europeans: genome-wide
- 724 association studies with functional follow-up. *Hum Genet* 134:823–835. [https://doi.org/10.1007/s00439-](https://doi.org/10.1007/s00439-015-1559-0)
- 725 [015-1559-0](https://doi.org/10.1007/s00439-015-1559-0)
- 726 16. Walsh S, Chaitanya L, Breslin K, et al (2017) Global skin colour prediction from DNA. *Hum Genet*
- 727 136:847–863. <https://doi.org/10.1007/s00439-017-1808-5>
- 728 17. Morgan MD, Pairo-Castineira E, Rawlik K, et al (2018) Genome-wide study of hair colour in UK Biobank
- 729 explains most of the SNP heritability. *Nat Commun* 9:5271. <https://doi.org/10.1038/s41467-018-07691-z>
- 730 18. Carbone MA, Llopart A, DeAngelis M, et al (2005) Quantitative trait loci affecting the difference in
- 731 pigmentation between *Drosophila yakuba* and *D. santomea*. *Genetics* 171:.
- 732 <https://doi.org/10.1534/genetics.105.044412>
- 733 19. Mundy NI (2007) Coloration and the Genetics of Adaptation. *PLoS Biol* 5:.
- 734 <https://doi.org/10.1371/journal.pbio.0050250>
- 735 20. Albertson RC, Powder KE, Hu Y, et al (2014) Genetic basis of continuous variation in the levels and
- 736 modular inheritance of pigmentation in cichlid fishes. *Mol Ecol* 23:.. <https://doi.org/10.1111/mec.12900>
- 737 21. Wollstein A, Walsh S, Liu F, et al (2017) Novel quantitative pigmentation phenotyping enhances genetic
- 738 association, epistasis, and prediction of human eye colour. *Sci Rep* 7:.. <https://doi.org/10.1038/srep43359>
- 739 22. Ritchie MD, Van Steen K (2018) The search for gene-gene interactions in genome-wide association
- 740 studies: challenges in abundance of methods, practical considerations, and biological interpretation. *Ann*
- 741 *Transl Med* 6:157. <https://doi.org/10.21037/atm.2018.04.05>
- 742 23. Branicki W, Brudnik U, Wojas-Pelc A (2009) Interactions between HERC2, OCA2 and MC1R may
- 743 influence human pigmentation phenotype. *Ann Hum Genet* 73:160–70. [https://doi.org/10.1111/j.1469-](https://doi.org/10.1111/j.1469-1809.2009.00504.x)
- 744 [1809.2009.00504.x](https://doi.org/10.1111/j.1469-1809.2009.00504.x)
- 745 24. Blanchard SG, Harris CO, Ittoop ORR, et al (1995) Agouti Antagonism of Melanocortin Binding and
- 746 Action in the B16F10 Murine Melanoma Cell Line. *Biochemistry.* <https://doi.org/10.1021/bi00033a012>
- 747 25. Suzuki I, Tada A, Ollmann MM, et al (1997) Agouti signaling protein inhibits melanogenesis and the
- 748 response of human melanocytes to  $\alpha$ -melanotropin. *J Invest Dermatol.* [https://doi.org/10.1111/1523-](https://doi.org/10.1111/1523-1747.ep12292572)
- 749 [1747.ep12292572](https://doi.org/10.1111/1523-1747.ep12292572)
- 750 26. Hepp D, Gonçalves GL, Moreira GRP, De Freitas TRO (2016) Epistatic interaction of the melanocortin 1
- 751 receptor and agouti signaling protein genes modulates wool color in the brazilian creole sheep. *J Hered.*

- 752 <https://doi.org/10.1093/jhered/esw037>
- 753 27. Fontanesi L, Scotti E, Allain D, Dall'Olio S (2014) A frameshift mutation in the melanophilin gene causes  
754 the dilute coat colour in rabbit (*Oryctolagus cuniculus*) breeds. *Anim Genet.*  
755 <https://doi.org/10.1111/age.12104>
- 756 28. Utzeri VJ, Ribani A, Fontanesi L (2014) A premature stop codon in the TYRP1 gene is associated with  
757 brown coat colour in the European rabbit (*Oryctolagus cuniculus*). *Anim Genet.*  
758 <https://doi.org/10.1111/age.12171>
- 759 29. Aigner B, Besenfelder U, Müller M, Brem G (2000) Tyrosinase gene variants in different rabbit strains.  
760 *Mamm Genome* 11:700–702. <https://doi.org/10.1007/s003350010120>
- 761 30. Fontanesi L, Forestier L, Allain D, et al (2010) Characterization of the rabbit agouti signaling protein  
762 (ASIP) gene: Transcripts and phylogenetic analyses and identification of the causative mutation of the  
763 nonagouti black coat colour. *Genomics.* <https://doi.org/10.1016/j.ygeno.2009.11.003>
- 764 31. Stephens M (2017) False discovery rates: A new deal. *Biostatistics.*  
765 <https://doi.org/10.1093/biostatistics/kxw041>
- 766 32. Paterson EK, Fielder TJ, MacGregor GR, et al (2015) Tyrosinase depletion prevents the maturation of  
767 melanosomes in the mouse hair follicle. *PLoS One* 10:. <https://doi.org/10.1371/journal.pone.0143702>
- 768 33. Cooper MP, Fretwell N, Bailey SJ, Lyons LA (2006) White spotting in the domestic cat (*Felis catus*) maps  
769 near KIT on feline chromosome B1. *Anim Genet* 37:163–165. <https://doi.org/10.1111/j.1365-2052.2005.01389.x>
- 770
- 771 34. Haase B, Rieder S, Leeb T (2015) Two variants in the *KIT* gene as candidate causative mutations for a  
772 dominant white and a white spotting phenotype in the donkey. *Anim Genet* 46:321–324.  
773 <https://doi.org/10.1111/age.12282>
- 774 35. Holl H, Isaza R, Mohamoud Y, et al (2017) A frameshift mutation in KIT is associated with white spotting  
775 in the Arabian camel. *Genes (Basel)* 8:. <https://doi.org/10.3390/genes8030102>
- 776 36. Hauswirth R, Jude R, Haase B, et al (2013) Novel variants in the KIT and PAX3 genes in horses with  
777 white-spotted coat colour phenotypes. *Anim Genet* 44:763–765. <https://doi.org/10.1111/age.12057>
- 778 37. Fontanesi L, Vargiolu M, Scotti E, et al (2014) The kit gene is associated with the english spotting coat  
779 color locus and congenital megacolon in checkered giant rabbits (*oryctolagus cuniculus*). *PLoS One* 9:.  
780 <https://doi.org/10.1371/journal.pone.0093750>
- 781 38. Dürig N, Jude R, Holl H, et al (2017) Whole genome sequencing reveals a novel deletion variant in the  
782 KIT gene in horses with white spotted coat colour phenotypes. *Anim Genet* 48:483–485.  
783 <https://doi.org/10.1111/age.12556>
- 784 39. Silvers WK, Silvers WK (1979) The Agouti and Extension Series of Alleles, Umbrous, and Sable. In: *The*  
785 *Coat Colors of Mice*
- 786 40. Norris BJ, Whan VA (2008) A gene duplication affecting expression of the ovine ASIP gene is responsible  
787 for white and black sheep. *Genome Res.* <https://doi.org/10.1101/gr.072090.107>
- 788 41. Robic A, Morisson M, Leroux S, et al (2019) Two new structural mutations in the 5' region of the ASIP  
789 gene cause diluted feather color phenotypes in Japanese quail. *Genet Sel Evol.*  
790 <https://doi.org/10.1186/s12711-019-0458-6>
- 791 42. Letko A, Ammann B, Jagannathan V, et al (2020) A deletion spanning the promoter and first exon of the  
792 hair cycle-specific ASIP transcript isoform in black and tan rabbits. *Anim Genet* 51:.  
793 <https://doi.org/10.1111/age.12881>
- 794 43. Henkel J, Saif R, Jagannathan V, et al (2019) Selection signatures in goats reveal copy number variants  
795 underlying breed-defining coat color phenotypes. *PLOS Genet* 15:e1008536.  
796 <https://doi.org/10.1371/journal.pgen.1008536>
- 797 44. Fontanesi L, Tazzoli M, Beretti F, Russo V (2006) Mutations in the melanocortin 1 receptor (MC1R) gene  
798 are associated with coat colours in the domestic rabbit (*Oryctolagus cuniculus*). *Anim Genet.*  
799 <https://doi.org/10.1111/j.1365-2052.2006.01494.x>
- 800 45. Fontanesi L, Scotti E, Colombo M, et al (2010) A composite six bp in-frame deletion in the melanocortin  
801 1 receptor (MC1R) gene is associated with the Japanese brindling coat colour in rabbits (*Oryctolagus*  
802 *cuniculus*). *BMC Genet.* <https://doi.org/10.1186/1471-2156-11-59>
- 803 46. Gross JB, Weagley J, Stahl BA, et al (2018) A local duplication of the Melanocortin receptor 1 locus in  
804 *Astyanax*. *Genome* 61:. <https://doi.org/10.1139/gen-2017-0049>



- 805 47. Zhang Z, Harrison P, Gerstein M (2002) Identification and analysis of over 2000 ribosomal protein  
806 pseudogenes in the human genome. *Genome Res* 12:1466–1482. <https://doi.org/10.1101/gr.331902>
- 807 48. Balasubramanian S, Zheng D, Liu YJ, et al (2009) Comparative analysis of processed ribosomal protein  
808 pseudogenes in four mammalian genomes. *Genome Biol* 10:R2. <https://doi.org/10.1186/gb-2009-10-1-r2>
- 809 49. Balasubramanian S, Zheng D, Liu YJ, et al (2009) Comparative analysis of processed ribosomal protein  
810 pseudogenes in four mammalian genomes. *Genome Biol* 10:. <https://doi.org/10.1186/gb-2009-10-1-r2>
- 811 50. Tonner P, Srinivasasainagendra V, Zhang S, Zhi D (2012) Detecting transcription of ribosomal protein  
812 pseudogenes in diverse human tissues from RNA-seq data. *BMC Genomics* 13:.  
813 <https://doi.org/10.1186/1471-2164-13-412>
- 814 51. Tonner P, Srinivasasainagendra V, Zhang S, Zhi D (2012) Detecting transcription of ribosomal protein  
815 pseudogenes in diverse human tissues from RNA-seq data. *BMC Genomics* 13:412.  
816 <https://doi.org/10.1186/1471-2164-13-412>
- 817 52. López S, Smith-Zubiaga I, De Galdeano AG, et al (2015) Comparison of the transcriptional profiles of  
818 melanocytes from dark and light skinned individuals under basal conditions and following ultraviolet-B  
819 irradiation. *PLoS One* 10:. <https://doi.org/10.1371/journal.pone.0134911>
- 820 53. Ear J, Hsueh J, Nguyen M, et al (2016) A Zebrafish Model of 5q-Syndrome Using CRISPR/Cas9 Targeting  
821 RPS14 Reveals a p53-Independent and p53-Dependent Mechanism of Erythroid Failure. *J Genet*  
822 *Genomics* 43:307–318. <https://doi.org/10.1016/j.jgg.2016.03.007>
- 823 54. McGowan KA, Li JZ, Park CY, et al (2008) Ribosomal mutations cause p53-mediated dark skin and  
824 pleiotropic effects. *Nat Genet* 40:963–970. <https://doi.org/10.1038/ng.188>
- 825 55. Walker G, Box N (2008) Ribosomal stress, p53 activation and the tanning response. *Expert Rev Dermatol*  
826 3:649–656. <https://doi.org/10.1586/17469872.3.6.649>
- 827 56. Arnheiter H, Bharti K (2008) Ribosomes and p53 - a new KIT for skin darkening. *Pigment Cell Melanoma*  
828 *Res* 21:501–502. <https://doi.org/10.1111/j.1755-148X.2008.00488.x>
- 829 57. Steiner CC, Weber JN, Hoekstra HE (2008) Erratum: Adaptive variation in beach mice produced by two  
830 interacting pigmentation genes (*PloS Biology* (2007) 5, 9, DOI: 10.1371/journal.pbio.0050219). *PLoS*  
831 *Biol.* 6:0418
- 832 58. Hepp D, Gonçalves GL, Moreira GRP, de Freitas TRO (2016) Epistatic Interaction of the Melanocortin 1  
833 Receptor and Agouti Signaling Protein Genes Modulates Wool Color in the Brazilian Creole Sheep. *J*  
834 *Hered* 107:544–552. <https://doi.org/10.1093/jhered/esw037>
- 835 59. Okamura K, Suzuki T (2020) Current landscape of Oculocutaneous Albinism in Japan. *Pigment Cell*  
836 *Melanoma Res.*
- 837 60. Mériot M, Hitte C, Rimbault M, et al (2020) Donskoy cats as a new model of oculocutaneous albinism  
838 with the identification of a splice-site variant in Hermansky–Pudlak Syndrome 5 gene. *Pigment Cell*  
839 *Melanoma Res* 33:814–825. <https://doi.org/10.1111/pcmr.12906>
- 840 61. Daly CMS, Willer J, Gregg R, Gross JM (2013) Snow white, a model of Hermansky-Pudlak syndrome  
841 type 5. *Genetics* 195:481–494. <https://doi.org/10.1534/genetics.113.154898>
- 842 62. Shi J, Yang XR, Ballew B, et al (2014) Rare missense variants in POT1 predispose to familial cutaneous  
843 malignant melanoma. *Nat Genet* 46:482–486. <https://doi.org/10.1038/ng.2941>
- 844 63. Robles-Espinoza CD, Harland M, Ramsay AJ, et al (2014) POT1 loss-of-function variants predispose to  
845 familial melanoma. *Nat Genet* 46:478–481. <https://doi.org/10.1038/ng.2947>
- 846 64. Trigueros-Motos L (2014) Mutations in POT1 predispose to familial cutaneous malignant melanoma. *Clin*  
847 *Genet* 86:217–218. <https://doi.org/10.1111/cge.12416>
- 848 65. Larue L (2020) Centenary theme section: SKIN MALIGNANCIES SIGNIFICANCE.  
849 <https://doi.org/10.2340/00015555-3494>
- 850 66. Newton-Bishop JA, Bishop DT, Harland M (2020) Melanoma genomics. *Acta Derm. Venereol.* 100:266–  
851 271
- 852 67. Sarthy VP, Pignataro L, Pannicke T, et al (2005) Glutamate transport by retinal Müller cells in  
853 glutamate/aspartate transporter-knockout mice. *Glia* 49:184–196. <https://doi.org/10.1002/glia.20097>
- 854 68. Chintala S, Li W, Lamoreux ML, et al (2005) Slc7a11 gene controls production of pheomelanin pigment  
855 and proliferation of cultured cells. *Proc Natl Acad Sci U S A* 102:10964–10969.  
856 <https://doi.org/10.1073/pnas.0502856102>
- 857 69. Tuson M, Marfany G, González-Duarte R (2004) Mutation of CERKL, a Novel Human Ceramide Kinase

- 858 Gene, Causes Autosomal Recessive Retinitis Pigmentosa (RP26). *Am J Hum Genet* 74:128–138.  
859 <https://doi.org/10.1086/381055>
- 860 70. Aleman TS, Soumitra N, Cideciyan A V., et al (2009) CERKL mutations cause an autosomal recessive  
861 cone-rod dystrophy with inner retinopathy. *Investig Ophthalmol Vis Sci* 50:5944–5954.  
862 <https://doi.org/10.1167/iovs.09-3982>
- 863 71. Avila-Fernandez A, Riveiro-Alvarez R, Vallespin E, et al (2008) CERKL mutations and associated  
864 phenotypes in seven Spanish families with autosomal recessive retinitis pigmentosa. *Investig Ophthalmol*  
865 *Vis Sci* 49:2709–2713. <https://doi.org/10.1167/iovs.07-0865>
- 866 72. Matsui R, McGuigan DB, Gruzensky ML, et al (2016) SPATA7: Evolving phenotype from cone-rod  
867 dystrophy to retinitis pigmentosa. *Ophthalmic Genet* 37:333–338.  
868 <https://doi.org/10.3109/13816810.2015.1130154>
- 869 73. Eblimit A, Agrawal SA, Thomas K, et al (2018) Conditional loss of Spata7 in photoreceptors causes  
870 progressive retinal degeneration in mice. *Exp Eye Res* 166:120–130.  
871 <https://doi.org/10.1016/j.exer.2017.10.015>
- 872 74. Sengillo JD, Lee W, Bilancia CG, et al (2018) Phenotypic expansion and progression of SPATA7-  
873 associated retinitis pigmentosa. *Doc Ophthalmol* 136:125–133. [https://doi.org/10.1007/s10633-018-9626-](https://doi.org/10.1007/s10633-018-9626-1)  
874 [1](https://doi.org/10.1007/s10633-018-9626-1)
- 875 75. Salmaninejad A, Bedoni N, Ravesh Z, et al (2020) Whole exome sequencing and homozygosity mapping  
876 reveals genetic defects in consanguineous Iranian families with inherited retinal dystrophies. *Sci Rep* 10.  
877 <https://doi.org/10.1038/s41598-020-75841-9>
- 878 76. Riazuddin SA, Iqbal M, Wang Y, et al (2010) A Splice-Site Mutation in a Retina-Specific Exon of BBS8  
879 Causes Nonsyndromic Retinitis Pigmentosa. *Am J Hum Genet* 86:805–812.  
880 <https://doi.org/10.1016/j.ajhg.2010.04.001>
- 881 77. Downs LM, Wallin-Håkansson B, Bergström T, Mellersh CS (2014) A novel mutation in TTC8 is  
882 associated with progressive retinal atrophy in the golden retriever. *Canine Genet Epidemiol* 1:4.  
883 <https://doi.org/10.1186/2052-6687-1-4>
- 884 78. Larzul C, De Rochambeau H (2005) Selection for residual feed consumption in the rabbit. *Livest Prod Sci*.  
885 <https://doi.org/10.1016/j.livprodsci.2004.12.007>
- 886 79. Drouilhet L, Gilbert H, Balmisse E, et al (2013) Genetic parameters for two selection criteria for feed  
887 efficiency in rabbits. *J Anim Sci*. <https://doi.org/10.2527/jas.2012-6176>
- 888 80. Garreau H, Ruesche J, Gilbert H, et al (2019) Estimating direct genetic and maternal effects affecting  
889 rabbit growth and feed efficiency with a factorial design. *J Anim Breed Genet*.  
890 <https://doi.org/10.1111/jbg.12380>
- 891 81. Miguel C, Carl-Johan R, Palma D, et al (2014) Rabbit genome analysis reveals a polygenic basis for  
892 phenotypic change during domestication. *Science* (80- )
- 893 82. Sargolzaei M, Chesnais JP, Schenkel FS (2014) A new approach for efficient genotype imputation using  
894 information from relatives. *BMC Genomics*. <https://doi.org/10.1186/1471-2164-15-478>
- 895 83. Behrouzi P, Wit EC (2019) De novo construction of polyploid linkage maps using discrete graphical  
896 models. *Bioinformatics*. <https://doi.org/10.1093/bioinformatics/bty777>
- 897 84. Zhou X, Stephens M (2012) Genome-wide efficient mixed-model analysis for association studies. *Nat*  
898 *Genet*. <https://doi.org/10.1038/ng.2310>
- 899 85. Zhou X, Carbonetto P, Stephens M (2013) Polygenic Modeling with Bayesian Sparse Linear Mixed  
900 Models. *PLoS Genet*. <https://doi.org/10.1371/journal.pgen.1003264>
- 901 86. Wang G, Sarkar A, Carbonetto P, Stephens M (2020) A simple new approach to variable selection in  
902 regression, with application to genetic fine mapping. *J R Stat Soc Ser B Stat Methodol*.  
903 <https://doi.org/10.1111/rssb.12388>
- 904 87. Chang CC, Chow CC, Tellier LC, et al (2015) Second-generation PLINK: rising to the challenge of larger  
905 and richer datasets. *Gigascience* 4:7. <https://doi.org/10.1186/s13742-015-0047-8>
- 906 88. Breiman L, Friedman J, Stone C, Olshen R (1984) *Classification and Regression Trees* (Wadsworth  
907 *Statistics/Probability*). New York CRC Press
- 908 89. Venables WN, Ripley BD (2002) *Modern Applied Statistics with S* Fourth edition by
- 909 90. Wickham H (2016) *ggplot2* *Elegant Graphics for Data Analysis* (Use R!)
- 910 91. D. Turner S (2018) *qqman*: an R package for visualizing GWAS results using Q-Q and manhattan plots. *J*

- 911 Open Source Softw. <https://doi.org/10.21105/joss.00731>
- 912 92. Therneau T, Atkinson B, Ripley B (2015) Package ‘rpart’
- 913 93. Cui Y, Chen X, Luo H, et al (2016) BioCircos.js: An interactive Circos JavaScript library for biological  
914 data visualization on web applications. *Bioinformatics*. <https://doi.org/10.1093/bioinformatics/btw041>
- 915 94. Shin J-H, Blay S, Graham J, McNeney B (2006) LDheatmap : An R Function for Graphical Display of  
916 Pairwise Linkage Disequilibria Between Single Nucleotide Polymorphisms . *J Stat Softw.*  
917 <https://doi.org/10.18637/jss.v016.c03>
- 918 95. Thorvaldsdóttir H, Robinson JT, Mesirov JP (2013) Integrative Genomics Viewer (IGV): High-  
919 performance genomics data visualization and exploration. *Brief Bioinform* 14:.  
920 <https://doi.org/10.1093/bib/bbs017>
- 921
- 922

923 **Legends of figures**

924 **Figure 1: Coat coloration association results for the whole experimental design. a.** Phenotypic  
925 classification. All rabbits were phenotyped in order to give them a phenotypic value. In total, 6 distinct  
926 coat pigmentations (P1 to P6) were considered and ordered in a gradient ranging from white to light and  
927 dark as quantitative phenotypes from 1 to 6. **b.** Manhattan plot. GWAS was performed using quantitative  
928 1 to 6 phenotypes under a linear mixed model. Location of SNPs on the x-axis is based on the reference  
929 OryCun2.0 genome and all scaffolds were regrouped under an extra chromosome Unknown. The dashed  
930 line represents the 5% genome-wide threshold. **c.** Q-Q plot corresponding to the GWAS analysis.  
931 Highlights on a few regions of interest **d** for *TYR* locus on Ocu1 (Ocu1<sub>*TYR*</sub>), **e** for *ASIP* locus on Ocu4  
932 (Ocu4<sub>*ASIP*</sub>), **f** for *KIT* locus on Ocu15 (Ocu15<sub>*KIT*</sub>) and **g** for *MC1R* locus on scaffold GL01865  
933 (GL018965<sub>*MC1R*</sub>) with regional Manhattan plots showing the best associated marker and already known  
934 mutations, and local linkage disequilibrium heatmap.

935

936 **Figure 2: Highlights on processed pseudogenes of ribosomal proteins (*RPS14* and *RPS20*). a.**  
937 Manhattan plot depicting posterior inclusion probabilities (PIP), which pinpoint fine mapping of  
938 genomic regions involved in cream to dark brown color variability including P3 to P6 colored rabbits.  
939 Location of SNPs on the x-axis is based on the reference OryCun2.0 genome and all scaffolds were  
940 regrouped under an extra chromosome Unknown. **b.** Screenshots of both Ocu1<sub>*RPS14*</sub> and Ocu14<sub>*RPS20*</sub>  
941 Ensembl regions. The first track represents the position of SNP on the Affymetrix® AxiomOrcun™  
942 SNP Array, the second track represents the annotated genes and the third track highlighted in yellow  
943 shows the quantification of transcripts in the generic rabbit sample (accession number  
944 SAMN00013655). **c.** Representation of both *RPS14* and *RPS20* processed pseudogenes in the  
945 OryCun2.0 reference genome. **d.** Screenshot of Integrative Genome Viewer showing alignments of  
946 reads obtained after RNA-seq experiments of skin samples from 3 Rex rabbits carrying black coat  
947 (accession number SRR1201255), white coat (accession number SRR1201256) or chinchilla coat  
948 (accession number SRR1201255).

949

950 **Figure 3: Epistatic interactions underlying the molecular architecture of coat coloration. a.**  
951 Pairwise epistatic interaction. Each count plot represents the genotypic distribution between the most  
952 significant markers of two out of the 7 associated loci previously identified. The x-axis represents  
953 genotypes at the locus mentioned on the line while the colored circles (pink, light purple and dark purple)  
954 represent genotypes at the locus mentioned on the column. The y-axis represents the 6 coat coloration  
955 phenotypic groups. The framed boxes correspond to significant interaction using the linear regression  
956 model. **b.** Decision tree. All rabbits were considered for all highlighted loci. The nodes discriminate  
957 genotypes at each involved marker with 0, 1 and 2 genotypes corresponding to the presence of 0, 1 or 2  
958 minor alleles, respectively. The final leaves are the distinct colored phenotypes with the repartition of  
959 rabbits within each group from 1 to 6. **c.** Epistatic network. Only rabbits with colored phenotypes P3 to

960 P6 were considered. Circular plot shows from external to internal tracks: chromosomes track (purple  
961 track), posterior inclusion probability (PIP) track ranging from 0 to 1 (green track), 6 identified regions  
962 track (*Ocu1<sub>RPS14</sub>*, *Ocu1<sub>TYR</sub>*, *Ocu4<sub>ASIP</sub>*, *Ocu14<sub>RPS20</sub>*, *Ocu15<sub>KIT</sub>* and *GL018965<sub>MC1R</sub>*) (pink track) and  
963 interactions track (central circle). Stars represent significant interactions with genes already known to  
964 contribute to coloration process.

965

966 **Figure 4: Copy number variation within *KIT* associated with white spotting phenotype. a.** B Allele  
967 Frequency (BAF) and Log R Ratio (LRR) plots. BAF and LRR values were plotted per phenotype (P1  
968 to P6) for all individuals for a region of 6 Mb centered around the *KIT* gene. For each marker, the average  
969 LRR per phenotype was evaluated and a sliding average using a window of 10 markers was shown in  
970 red on LRR plots. **b.** Genotyping data extracted from the Axiom™ Analysis Suite Software 4.0.3.3 for  
971 the SNP AX-147098951 (93,916,801 bp) located within the *KIT* gene. Additional groups of genotypes  
972 likely reflecting a copy number variation spanning this marker. **c.** Manhattan plot. GWAS was  
973 performed using LRR values for each SNP and by a comparison of rabbits with phenotype P2 vs. all  
974 others groups of colored animals (P3 to P6).

975

976 **Figure 5: Model of pigmentation molecular architecture through melanogenesis pathway.** Both  
977 core genes and gene-gene interactions are represented. Core genes identified here to account for coat  
978 color variability are in bold, marked with a star and colored in yellow (*TYR*), green (*KIT*), dark pink  
979 (*MC1R*), light pink (*ASIP*), purple (*RPS20*) and blue (*RPS14*). Major genes involving *TYR* and *KIT* are  
980 responsible of white (P1) (yellow circle) and spotted (P2) (green circle) phenotypes, respectively. The  
981 remaining cream to dark brown phenotypes (P3 to P6) are explained by *ASIP*, *MC1R*, *TYR* and *RPS*  
982 genes as main effects but also through epistatic interactions. While *ASIP:MC1R* interactions contribute  
983 mainly to light colored rabbits (P3 and P4) (pink circle), *KIT:RPS* (including both *RPS14* and *RPS20*)  
984 epistasis seem account for darker colorations through tanning response (purple circle).

985

986 **Table 1: Genes and mutations responsible of coat coloration phenotypes in rabbits**

| Locus                 | Gene         | Location | Allele                                                   | Mutation                              | Phenotype      | Reference |
|-----------------------|--------------|----------|----------------------------------------------------------|---------------------------------------|----------------|-----------|
| A (Agouti)            | <i>ASIP</i>  | Ocu4     | A > a <sup>1</sup> > a                                   | A = wt                                | agouti         | [30, 42]  |
|                       |              |          |                                                          | a <sup>1</sup> = 11Kb deletion        | tan            |           |
|                       |              |          |                                                          | a = c.5_6insA                         | non-agouti     |           |
| B (Brown)             | <i>TYRP1</i> | Ocu1     | B > b                                                    | B = wt                                | black          | [28]      |
|                       |              |          |                                                          | b = g.41360196                        | brown          |           |
| C (Color)             | <i>TYR</i>   | Ocu1     | C > C <sup>ch</sup> > C <sup>h</sup> > c                 | C = wt                                | full color     | [29]      |
|                       |              |          |                                                          | C <sup>ch</sup> = T358I               | chinchilla     |           |
|                       |              |          |                                                          | C <sup>h</sup> = E294G                | himalayan      |           |
|                       |              |          |                                                          | c = c.304_333del30                    | albino         |           |
| D (Dilution)          | <i>MLPH</i>  | GL018840 | D > d                                                    | D = wt                                | non-dilute     | [27]      |
|                       |              |          |                                                          | d = g.549853delG                      | dilute         |           |
| E (Extension)         | <i>MC1R</i>  | GL018965 | E <sup>d</sup> > E <sup>s</sup> > E > e <sup>j</sup> > e | E <sup>d</sup> = c.2806285del6        | black          | [44, 45]  |
|                       |              |          |                                                          | E <sup>s</sup> = unknown              | steel          |           |
|                       |              |          |                                                          | E = wt                                | full extension |           |
|                       |              |          |                                                          | e <sup>j</sup> = c.[124A;125_130del6] | japanese       |           |
|                       |              |          |                                                          | e = c304_333del30                     | non-extension  |           |
| En (English Spotting) | <i>KIT</i>   | Ocu15    | En > en                                                  | En = unknown                          | spotted        | [37]      |
|                       |              |          |                                                          | en = wt                               | non-spotted    |           |

987 Genomic locations correspond to either chromosome, (Ocu1 for *Oryctolagus cuniculus* chromosome 1)

988 or scaffold (GL018840) based on the European rabbit reference genome OryCun2.0.

989

990 **Additional files**

991 Additional file 1 corresponds to all supplementary tables

992 Additional file 2 corresponds to all supplementary figures

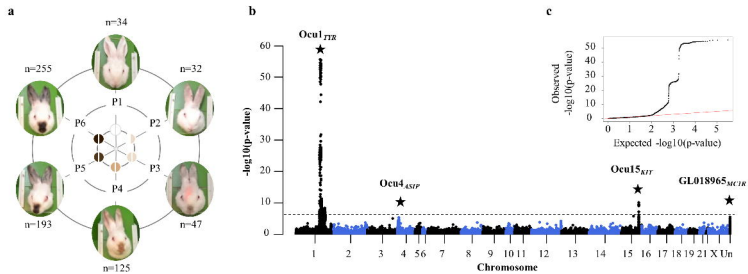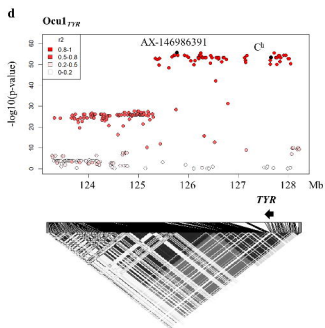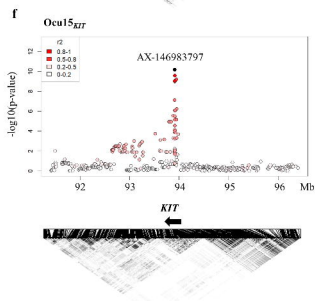





a

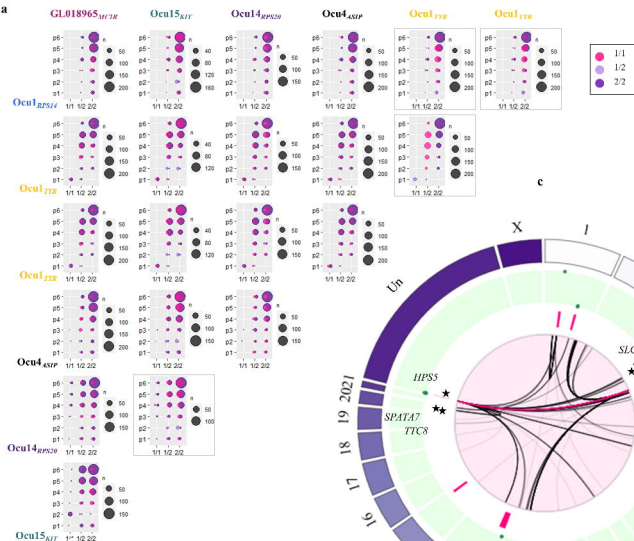

c

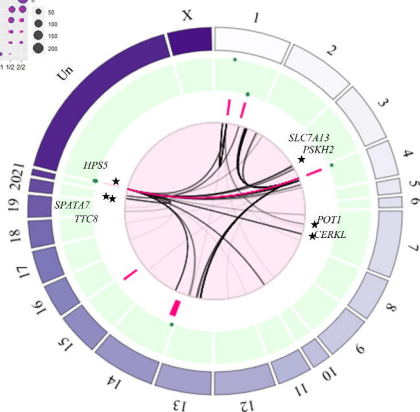

b

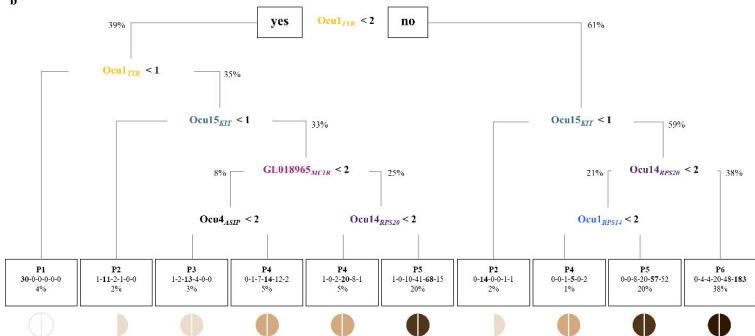

**a**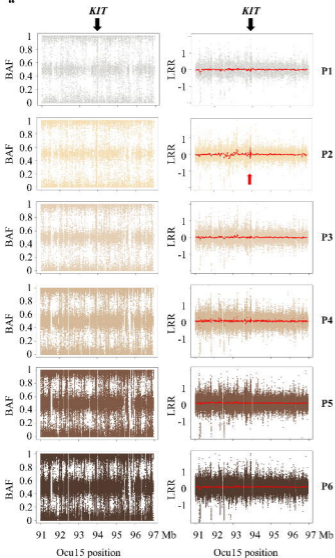**b**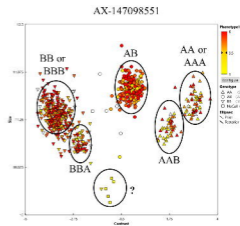**c**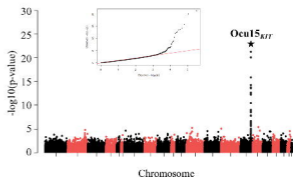

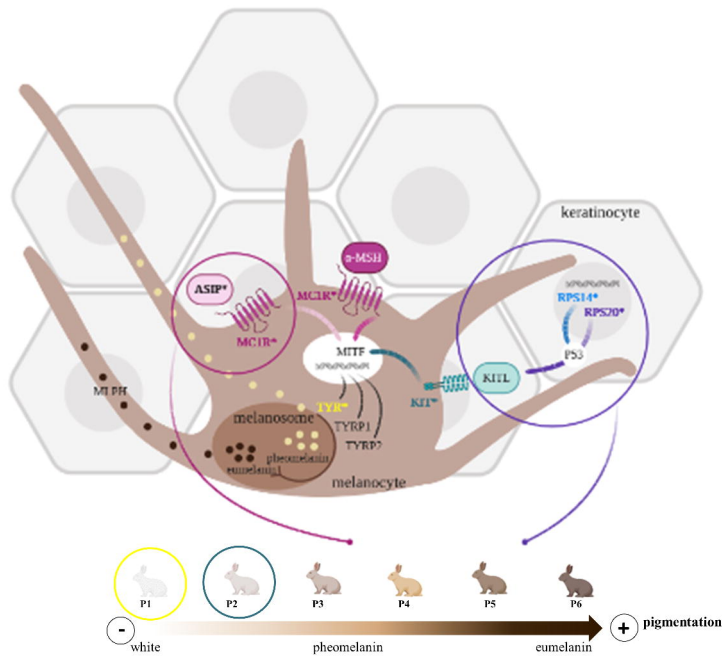

Source: https://www.biorxiv.org/content/biorxiv/early/2021/10/09/2021.10.07.463146.full.pdf
